25 **Keywords:** Genome architecture, TAD, Polycomb, tetrapod evolution, enhancers,  
26 regulatory landscapes.

27

28 **Background:** The spatial organization of the mammalian genome relies upon the  
29 formation of chromatin domains of various scales. At the level of gene regulation *in*  
30 *cis*, collections of enhancer sequences define large regulatory landscapes that usually  
31 match with the presence of topologically associating domains (TADs). These domains  
32 are largely determined by bound CTCF molecules and often contain ranges of  
33 enhancers displaying similar or related tissue specificity, suggesting that in some  
34 cases such domains may act as coherent regulatory units, with a global on or off state.

35 **Results:** By using the *HoxD* gene cluster as a paradigm, we investigated the effect of  
36 large genomic rearrangements affecting the two TADs flanking this locus, including  
37 their fusion into a single chromatin domain. We show that, within a single hybrid  
38 TAD, the activation of both proximal and distal limb enhancers initially positioned in  
39 either TADs globally occurred as when both TADs are intact. We also show that the  
40 timely implementation of distal limb enhancers depends on whether or not target  
41 genes had previously responded to proximal enhancers, due to the presence or absence  
42 of H3K27me3 marks.

43 **Conclusions:** From this work, we conclude that antagonistic limb proximal and distal  
44 enhancers can exert their specificities when positioned into the same TAD and in the  
45 absence of their genuine target genes. We also conclude that removing these target  
46 genes reduced the coverage of a regulatory landscape by chromatin marks associated  
47 with silencing and thus prolonged its activity in time. Since Polycomb group proteins  
48 are mainly recruited at the *Hox* gene cluster, our results suggest that Polycomb

49 Repressive Complex 2 (PRC2) can extend its coverage to far-*cis* regulatory sequences  
50 as long as confined to the neighboring TAD structure.

51

## 52 **BACKGROUND**

53           Attempts to understand the spatial organization of the genome in the  
54 nucleus have recently led to models accounting for the relationship between genome  
55 structure and gene regulation (see [1]). The development of chromosome  
56 conformation capture techniques associated with deep sequencing has thus allowed  
57 the resolution of DNA interactions at a small scale [2]. These interactions can be  
58 either structural or functional, i.e. they can be present regardless of the transcriptional  
59 outcome or alternatively, they can fluctuate according to cell-type specific context  
60 depending upon the transcriptional status [3]. Constitutive contacts generally tend to  
61 fit the loop extrusion model, whereby the packed network of chromatin loops would  
62 form as a result of DNA extrusion by an ATP-dependent cohesin-based complex. The  
63 loops are stabilized whenever this cohesin ring meets two CTCF molecules bound  
64 with convergent orientations [4–6].

65           Chromatin is organized in several levels of interactions, loops and domains. At  
66 the level of gene regulation, topologically associating domains (TADs) [7, 8][9]  
67 usually match large domains of long-range gene regulation referred to as regulatory  
68 landscapes [10]. These structures are globally detected in all cell types and conserved  
69 across vertebrate species [7, 11–15]. The experimental depletion of either CTCF or  
70 cohesin subunits lead to a loss of both loop organization and TAD structure. Under  
71 these conditions, however, the effects upon gene transcription were limited and the  
72 formation of larger structures (compartments), which may also be functionally  
73 relevant, still occurred although in an altered manner [16–19][20].

74           Compartments contain chromatin domains labelled by various epigenetic  
75 marks. Inactive chromatin domains labelled by histone H3 lysine 27 trimethylation  
76 (H3K27me3), resulting from the presence of Polycomb group protein complexes,  
77 have been associated either with compartment A [21] or with a compartment B1,  
78 distinct from the genuine heterochromatin B compartment [5], which may segregate  
79 from other chromatin domains through phase separation [22, 23]. In addition,  
80 facultative heterochromatin (H3K27me3-positive) was shown to correlate with long-  
81 distance interactions either in stem cells [24–26] or during embryonic development  
82 [21, 27].

83           Distinct functional states associated with various chromatin structures are not  
84 as clear when TADs are considered. While several examples exist showing the  
85 functional coherence of multiple enhancer sequences present within one particular  
86 TAD [28–31][32], the definition of TADs as global independent regulatory units still  
87 lacks experimental evidence. In many instances indeed, TADs include either series of  
88 enhancers with the same -or related- specificity, or enhancers with distinct tissue-  
89 specific potentials but involved in the pleiotropic regulation of the same target  
90 gene(s). However, whether or not the entire TAD adopts a global on or off state, for  
91 example related to a particular architecture, remains to be established.

92           A useful experimental paradigm to address this question is the  
93 mammalian *HoxD* gene cluster, a group of genes located at the intersection between  
94 two TADs displaying distinct functional specificities [33]. During limb development,  
95 enhancers in the telomeric TAD (T-DOM) regulate the transcription of *Hoxd8* to  
96 *Hoxd11* in proximal limb bud cells. Subsequently, enhancers in the centromeric TAD  
97 (C-DOM) control from *Hoxd9* to *Hoxd13* in distal limb bud cells [33]. These different  
98 sets of target genes responding to either one of the regulatory domains are determined

99 by a robust boundary, centered around *Hoxd11* and relying upon a collection of bound  
100 CTCF sites. Genetic analyses *in vivo* revealed that this boundary was very resilient  
101 and that even a full deletion of the gene cluster was unable to merge both TADs into  
102 one single domain, likely due to a few remaining occupied CTCF sites [34].

103 The analysis of different developmental contexts where *Hoxd* genes are  
104 transcribed demonstrates that these two TADs are functionally exclusive from one  
105 another, i.e. the concomitant function of enhancers belonging to the two domains has  
106 not been observed thus far. This is due to the fact that the main gene responding to C-  
107 DOM enhancers is *Hoxd13*, whose product, along with that of *Hoxa13*, has a negative  
108 effect over T-DOM enhancers through direct binding, as observed in ChIP-seq  
109 experiments [32, 35]. This bimodal regulation can also be followed by the appearance  
110 of relevant chromatin marks: while T-DOM is largely covered by H3K27ac marks in  
111 proximal limb bud cells, it becomes rapidly decorated by H3K27me3 marks at the  
112 time C-DOM starts to be active in distal cells and to accumulate H3K27ac labelling  
113 [33]. Therefore, in distal cells, not only the *Hoxd1* to *Hoxd8* gene are covered by  
114 H3K27me3 (they are no longer transcribed), but also large DNA intervals within T-  
115 DOM, reflecting the off state of this regulatory landscape and re-enforcing the idea  
116 that it may behave as a coherent regulatory unit.

117 In this paper, we challenged this hypothesis by investigating the effects of  
118 combining the two TADs into a single domain (a neoTAD), after deletion of a large  
119 piece of DNA containing the *HoxD* cluster as well as other boundary elements. After  
120 fusion, this neoTAD regroups enhancers that do not normally function in the same  
121 cellular context. We asked whether these various enhancers would keep their initial  
122 functional specificities or, alternatively, if they would all be active or repressed  
123 concomitantly as a result of this new topological proximity. We also used a set of

124 inversions, which disconnected the target genes from their TADs to evaluate the  
125 functional and epigenetic behavior of regulatory sequences in the absence of their  
126 target genes.

127

## 128 RESULTS

129 In order to better visualize the spatial distribution of the two TADs  
130 associated with the *HoxD* cluster (Fig. 1A), we modeled their structures in 3D by  
131 using Hi-C matrices [34] for both distal and proximal E12.5 limb bud cells (Fig. 1B)  
132 and the TADkit scripts package as a 3D modeling viewer [36]. In the wild-type  
133 condition, the *HoxD* cluster contained a strong boundary and was thus positioned  
134 between the two regulatory domains T-DOM and C-DOM, in both distal and proximal  
135 limb cells (Fig. 1B). In both tissues, the region called CS38-41 (Fig.1, red disk)  
136 established a weaker boundary between two sub-TADs in T-DOM. The structure and  
137 separation between the two regulatory domains were generally conserved between the  
138 two cell types, although with some minor differences.

139 We applied the same 3D modeling viewer to Hi-C datasets obtained with limb  
140 bud cells from the *HoxD*<sup>Del(1-13)d9lac</sup> mutant mouse stock (hereafter *Del(1-13)d9lac*),  
141 which contains a deletion including the *HoxD* cluster [34] (see Additional File 1). In  
142 this mutant, the deleted DNA was substituted by a *Hoxd9lac* reporter transgene while  
143 the *Evx2* and *LnPk* genes remain present. In the absence of the *HoxD* cluster, C-DOM  
144 and T-DOM were still observed as independent structures despite a substantial  
145 shortening of the distance separating them (Additional File 1B-C). A clear spatial  
146 contraction was nevertheless scored between C-DOM and the first sub-TAD in T-  
147 DOM until region CS38-41 (Additional File 1B, C, red disk).

148 We next used the *HoxD*<sup>del(attP-Rel5)d9lac</sup> (hereafter *Del(attP-Rel5)d9lac*) Hi-C  
149 datasets from mutant limbs lacking ca. 350kb of DNA including the *HoxD* cluster  
150 plus flanking regions (Fig. 1A, C). With this large deletion, the two TADs merged  
151 into one single structure (Fig. 1C) regardless of the cell type considered (distal or  
152 proximal), indicating that the TAD boundary had been entirely deleted. In this stock,  
153 the same *Hoxd9lac* transgene could be used as a transcriptional readout. The  
154 consolidation of T-DOM and C-DOM into one single structure was obvious up to the  
155 CS38-41 region, whereas the most telomeric located sub-TAD in T-DOM was  
156 somewhat less engulfed (Fig. 1C). We also computed an eigenvector analysis and  
157 distributed the interacting domains according to the first eigenvector values. We  
158 concluded that the position of the *HoxD* locus in compartment A, as well as the  
159 general compartment distribution along chromosome 2, were virtually identical  
160 between distal and proximal cells, when both the wild type and the *del(attP-*  
161 *Rel5)d9lac* datasets were considered (Additional File 1D).

162

### 163 **Transcription at the *HoxD* locus in the absence of the *HoxD* cluster**

164 We looked at transcription emanating from the *lacZ* reporter transgenes by  
165 whole-mount *in situ* hybridization (WISH) on E11.5 fetuses, using a *LacZ* RNA probe  
166 and could identify both the distal and proximal limb domains in the two *del(attP-*  
167 *Rel5)d9lac* and *del(1-13)d9lac* lines, though with subtle variations in their relative  
168 strengths (arrowheads Additional File 2A). Therefore, even in the complete absence  
169 of a TAD boundary, the functional partition of proximal and distal enhancers occurred  
170 in a close-to-normal manner, with a clear separation between the two expression  
171 domains. While the distal domain overlapped well with the wild type *HoxD* distal  
172 limb pattern, the proximal domain was somewhat different in shape and position from

173 the wild type *Hoxd9* pattern, resembling the expression pattern of the *Hog* lncRNA  
174 [34] thus likely indicating some enhancer reallocation due to the novel topology of the  
175 locus.

176 In order to have a complete account of such local modifications in  
177 transcriptional responses following the fusion of the two TADs, we carried out RNA-  
178 seq for both proximal and distal cell populations in control (*Wt*) and *del(attP-*  
179 *Rel5)d9lac* mutant limbs at E12.5. In control proximal cells, transcripts were  
180 expectedly detected both at the *HoxD* cluster, at the flanking *LnPk* and *Mtx2* genes as  
181 well as for the *Hog* and *Tog* lncRNAs, two non-coding RNAs localized within T-  
182 DOM and normally responding to T-DOM enhancers [34, 37] (Fig. 2A, top). In  
183 control distal cells, while the expression of the latter two lncRNAs was undetectable,  
184 digit-specific transcripts were scored over the Island3 region both by RNA-seq and by  
185 WISH (Fig. 2B, top and Additional File 2B), a region previously defined as a distal  
186 cells-specific enhancer [38]. Therefore, we used these non-coding RNAs (*Hog*, *Tog*  
187 and Island3) as proxys to evaluate the activity of their surrounding proximal *versus*  
188 distal enhancers in the absence of the target *Hoxd* genes.

189 In proximal mutant limb cells, the *Hog* and *Tog* RNA levels substantially  
190 increased (adjusted p-value from DESeq2 analysis of 1.75e-10 and 6.72e-22,  
191 respectively) while at the same time, the mRNA levels corresponding to the  
192 housekeeping genes *Mtx2* and *Atf2* remained approximately the same (adjusted p-  
193 value=1.00) (Fig. 2A, bottom and Additional File 2C). Transcripts for *Hoxd* genes and  
194 *LnPk* had expectedly disappeared after the deletion, yet a signal remained for *Hoxd9*  
195 reflecting the transcription of the reporter gene left in place. Of note, the level of  
196 Island3 e-RNA did not seem to increase in the deleted configuration. Therefore, while  
197 in the absence of target *Hoxd* genes, proximal enhancers within former T-DOM were



198 partly re-allocated towards the *Hog* and *Tog* promoters, they did not seem to affect  
199 *Island3* expression, despite the removal of the TAD boundary (Fig. 2A, bottom,  
200 Additional File 2C).

201 In distal limb cells, the level of *Island3* e-RNA decreased in the deleted  
202 configuration (Fig. 2B, C). While this transcript did not appear as differentially  
203 expressed in our RNA-seq whole genome analysis due to restrictive parameters (46%  
204 reduction mutant versus control, p-value=1.4e-4; Additional File 2D), it showed a  
205 significant reduction by qPCR (40% reduction mutant versus control, Welch's *t*-test p-  
206 value= 0.0166) and by WISH (Fig. 2C). Likely, this decrease of expression was due to  
207 the loss of the GCR and Prox distal enhancers, as suggested by the deletion of the  
208 *Rel1* to *Rel5* region. A comparable outcome was observed in the deletion SB1 to *Atf2*,  
209 which removes two different enhancers (*island1* and 2) on the other end of the  
210 regulatory domain (Fig. 2D, E). Noteworthy, neither of the housekeeping transcription  
211 units was transcribed more efficiently. However, a significant increase in *Hog* and  
212 *Tog* lncRNAs was scored, while these two genes are normally silent in distal cells  
213 where T-DOM has been switched off (Fig. 2B, Additional File 2D). Such an up-  
214 regulation could illustrate either a weakening in T-DOM repression in distal cells, or  
215 novel interactions between distal enhancers located in former C-DOM and the two  
216 lncRNAs' loci, following the deletion of the TAD boundary.

217

### 218 **Changes in chromatin marks after TADs fusion**

219 We complemented these observations by looking at the acetylation of  
220 H3K27, using proximal and distal E12.5 limb bud tissue derived from both control  
221 and *del(attP-Rel5)d9lac* fetuses. In proximal cells, the distribution of H3K27ac marks  
222 in the mutant material was as in control (wild type) cells (Fig. 3A). H3K27ac

223 modifications were found enriched in T-DOM (the active TAD) while depleted from  
224 C-DOM (the inactive TAD). The amount of H3K27ac was slightly increased over a  
225 large region of T-DOM in mutant cells, with a particular increase at the transcription  
226 start site of both *Hog* and *Tog* (Fig. 3A, 120% increase, arrowhead), thus matching the  
227 previously described increase in RNA levels (Fig. 2). The distribution of H3K27ac  
228 marks over C-DOM was comparable in control and mutant proximal cells (Fig. 3A,  
229 see *del versus Wt*).

230 In *del(attP-Rel5)d9lac* mutant distal cells, an increase in H3K27ac was scored  
231 at region CS38-41 (Fig. 3B, 75% increase), which correlated with the activation of  
232 these two lncRNAs in these mutant cells, while they are normally silent in their wild-  
233 type counterparts (Fig. 2B). Additionally, a strong increase in this histone mark was  
234 scored in CS93 (Fig. 3B, arrow, 75% increase), a region recently characterized as a  
235 proximal limb enhancer [15]. The general distribution of H3K27ac appeared slightly  
236 increased throughout T-DOM in mutant cells when compared to control (Fig. 3B).  
237 This slight increase in T-DOM activity was also noticeable when analyzing proximal  
238 mutant tissue. A striking effect was however observed in H3K27ac coverage over C-  
239 DOM, in mutant *versus* control distal cells. A substantial loss of H3K27ac was indeed  
240 scored over the regulatory regions island 1, 2, 4 and 5 (Fig. 3B, about 40% decrease).  
241 This effect was not as evident over island 3, i.e. in the region where the enhancer  
242 transcript was detected in both control and mutant distal cells (Fig. 2B). Therefore, in  
243 distal cells, the fusion of both TADs and removal of target genes seemed to weaken  
244 the transcriptional activity of C-DOM, while maintaining the activity of T-DOM well  
245 above the silencing observed in control distal cells.

246 To further document this observation, we looked at the distribution of  
247 H3K27me3 marks. In control proximal limb cells, H3K27me3 were detected over T-

248 DOM at E12.5 (Fig. 3C), i.e. when this landscape is still functionally active, likely  
249 due to the presence of a large percentage of negative cells in the dissected material  
250 (see [33]). In distal cells, where T-DOM is switched off, a robust increase was  
251 detected with a strong coverage of the entire T-DOM (Fig. 3D). In proximal cells,  
252 H3K27me3 marks were also scored over the silent C-DOM regulatory islands, a  
253 labeling that mostly disappeared upon the activation of these regulatory islands in  
254 distal cells (Fig. 3D). The H3K27me3 profiles obtained with the *del(attP-Rel5)d9lac*  
255 mutant limb buds were in agreement with the distributions of both the H3K27ac  
256 marks and the transcripts. In proximal mutant cells, the profile was globally similar to  
257 that seen in control cells with however a 50 percent decrease at region CS38-41 (Fig.  
258 3C). In distal cells, the same effect was scored, yet at a much higher magnitude.  
259 H3K27me3 marks were heavily depleted from T-DOM whereas they were found  
260 mildly but significantly enriched all over the C-DOM region containing the regulatory  
261 islands (Fig. 3D, respectively 50% decrease and 20% increase). Therefore, these  
262 results confirmed that in mutant cells carrying the combined neoTAD, the former T-  
263 DOM landscape is globally overactive in distal cells, at the expense of C-DOM  
264 enhancers, which appear less active than in their native context.

265

### 266 **Recruitment of PRC complexes at the *HoxD* cluster and surroundings**

267 Polycomb repressive complexes (PRC1 and PRC2) are generally  
268 associated with lack of gene expression and usually recruited to CpG islands close to  
269 transcriptionally active regions [24, 39, 40]. In this context, the massive presence of  
270 H3K27me3 marks over T-DOM, a region largely devoid of coding units, raised the  
271 question of the recruitment mechanism at work. We looked at the presence of both  
272 EZH2 and RING1B, two components of PRC2 and PRC1, respectively. CHIP

273 experiments revealed that EZH2 was located mostly within the *HoxD* cluster (Fig.  
274 4A). Outside the gene cluster, a weak enrichment was scored over region CS38-41 in  
275 proximal cells, which appeared even weaker in distal cells. Altogether, the two gene  
276 deserts were generally devoid of PRC2. A comparable conclusion was reached  
277 regarding the prevalence of signal at the cluster, with the analysis of the PRC1  
278 component RING1B, even though some enrichment was detected on the gene deserts,  
279 generally over T-DOM and particularly over the CS38-41 and CS65 regions, without  
280 any striking difference between distal and proximal cells (Fig. 4A). Some light  
281 differences were scored in C-DOM, where a few regulatory regions appeared  
282 specifically decorated in proximal tissue but devoid of RING1B in distal tissue  
283 (compare Island1 and Island4 in Fig. 4A).

284         Within the *HoxD* cluster itself, the distribution of both EZH2 and RING1B  
285 nicely matched the coverage by H3K27me3 in its general and tissue-specific extents  
286 (Fig. 4B) [1–3]. In proximal cells, the coverage was minimal over those genes active  
287 in response to T-DOM enhancers (from *Hoxd8* to *Hoxd11*, rectangle in Fig. 4B, tracks  
288 1 and 2), while in distal cells genes responding to C-DOM enhancers were bound only  
289 weakly by either PRC2 or PRC1 (from *Hoxd13* to *Hoxd10*, Fig. 4B, rectangle in  
290 tracks 4 and 5). The EZH2 signals were significantly enriched at CpG islands and  
291 over coding regions, whereas the distribution of PRC1 was broader (Fig. 4B),  
292 suggesting a recruitment of PRC2 by CpG islands [24, 40, 41].

293         Considering that H3K27me3 covered both *Hox* genes and their regulatory  
294 landscapes, whereas PRC complexes were mostly recruited to the *HoxD* cluster itself,  
295 we wondered whether the reduction of H3K27me3 marks along T-DOM in *del(attP-*  
296 *Rel5)d9lac* mutant proximal cells could result from the mere absence of the *HoxD*  
297 gene cluster. To this aim, we used the engineered *HoxD<sup>inv(attP-Iiga6)</sup>* inversion (hereafter

298 *inv(attP-Itga6)*), where the *HoxD* cluster was disconnected from T-DOM and  
299 displaced circa 3Mb away while preserving both its integrity and its association with  
300 C-DOM [42] (Additional File 3).

301 We verified that the genomic interactions between *Hoxd* genes and T-DOM  
302 were abrogated in this *inv(attP-Itga6)* inverted allele by performing a 4C-seq analysis  
303 in mutant and control distal limb cells, with *Hoxd4* and CS38 as viewpoints (Fig. 5A).  
304 Expectedly, the contacts established by *Hoxd4* were no longer oriented towards T-  
305 DOM in the inversion allele, when compared with control (Fig. 5A, tracks 1 and 2). In  
306 this inverted allele, interactions were now established *de novo* between *Hoxd4* and a  
307 region around the *Itga6* and *Dlx1/Dlx2* genes, near the inversion breakpoint. Also,  
308 contacts with C-DOM were slightly increased. Furthermore, when region CS38 was  
309 used as a viewpoint, interactions with the *HoxD* cluster were largely lost and most  
310 contacts remained within T-DOM itself (Fig. 5A, tracks 3 and 4).

311 In this inverted configuration, the global amount of H3K27me3 marks  
312 deposited over T-DOM was substantially lower when compared to the control cells  
313 (Fig. 5B, tracks 1 and 2). This decrease was not observed when another inversion was  
314 used as a control. In the *HoxD<sup>inv(Nsi-Itga6)</sup>* allele (hereafter *inv(Nsi-Itga6)*) [43] the *HoxD*  
315 cluster remains in place yet C-DOM is inverted towards the same *Itga6* breakpoint.  
316 Therefore, these two inversions are identical except that one contains the *HoxD*  
317 cluster whereas the other does not (Fig. 5B, arrows in tracks 2 and 4 and additional  
318 File 3). In the *inv(Nsi-Itga6)* inversion allele, the enrichment of H3K27me3 over T-  
319 DOM was not decreased, as was the case for the *inv(attP-Itga6)* allele (Fig. 5B),  
320 neither in distal cells, nor in proximal cells (Additional File 3B). Altogether these  
321 results and those obtained with the *del(attP-Rel5)d9lac* allele, suggest that the

322 presence of *Hoxd* genes was necessary to achieve a full spread of H3K27me3 marks  
323 over T-DOM, up to 800kb in *far-cis*.

324 Interestingly, this effect was restricted to T-DOM, as seen after zooming out  
325 and looking at a 10 Mb interval surrounding the *HoxD* cluster. In control distal cells,  
326 the distribution of H3K27me3 marks was enriched selectively over T-DOM,  
327 terminating abruptly at its TAD boundary with no further telomeric spreading. In  
328 mutant *del(attP-Rel5)d9lac* distal cells, despite the large reduction of H3K27me3  
329 signals, the remaining coverage was also restricted up to the new telomeric boundary  
330 of the neoTAD (Additional file 4A). Comparable results were obtained when  
331 comparing the mutant *inv(attP-Itga6)*. In all cases, though to a different extent, the  
332 TAD structure appeared to determine the extent of H3K27me3 spreading.

333

### 334 **H3K27me3 inheritance and clearance**

335 The *inv(attP-Itga6)* allele disconnected T-DOM proximal enhancers from  
336 their target *Hoxd3* to *Hoxd11* genes, similar to a previous case when a deletion of T-  
337 DOM was used [33]. In both cases, expression of these target genes was expectedly  
338 lost in proximal cells of the forelimb buds (Fig. 6A, B; see also [33]). Unexpectedly  
339 however, both the quantity and distribution of *Hoxd9* and *Hoxd11* mRNAs (see digits  
340 II and V) were also reduced in distal cells, where these genes are under the control of  
341 C-DOM enhancers (Fig. 6A, B, arrows and arrowheads respectively). This surprising  
342 observation was explained by the lineage transmission, from proximal to distal cells,  
343 of H3K27me3 marks abnormally present in *Hoxd* genes in the absence of T-DOM  
344 [33].

345 To further assess this possibility, we analyzed the precise distribution of  
346 H3K27me3 marks over the *HoxD* cluster in the *inv(attP-Itga6)* allele. In proximal

347 cells, we found a high and homogeneous coverage of this histone modification, from  
348 *Hoxd1* up to *Evx2*, unlike in the control allele where the DNA interval between *Hoxd8*  
349 and *Hoxd11* was transcriptionally active and hence depleted from this mark (Fig. 6C,  
350 tracks 1 and 2). Accordingly, the homogeneous distribution of H3K27me3 over the  
351 gene cluster in the mutant allele reflected the complete lack of *Hoxd* expression in  
352 proximal cells (Fig. 6A tracks 1 and 2 and Fig. 6B). In control distal cells, the region  
353 from *Evx2* to *Hoxd9* was depleted in H3K27me3 marks, as expected from the  
354 regulation of C-DOM enhancers. In inverted mutant cells however, an abnormally  
355 high H3K27me3 coverage was scored over the *Hoxd9* to *Hoxd11* region (Fig. 6C,  
356 arrow in track 4), which corresponded to the decrease in transcript levels observed for  
357 these genes in mutant distal cells (Fig. 6A tracks 3 and 4). This increase in  
358 H3K27me3 was not observed in the *inv(Nsi-Itga6)*, where these genes are normally  
359 expressed in proximal tissue (Additional File 5). Because distal limb bud cells are the  
360 descendants in lineage of proximal cells (see [44]), we explain this negative effect over  
361 C-DOM regulation by the transmission of H3K27me3 to distal cells. This mark was  
362 ectopically detected over the *Hoxd4* to *Hoxd11* region in proximal cells, due to the  
363 lack of contacts between proximal enhancers and their target *Hoxd* genes, thus  
364 preventing their transcriptional activation. Of note, *Hoxd13* and *Evx2* transcript levels  
365 remained unchanged in the mutant allele when compared to control.

366 We assessed whether this ectopic gain of H3K27me3 in proximal cells would  
367 translate into a change in the extent of the negative chromatin sub-domain formed at  
368 *Hox* loci by H3K27me3-enriched sequences [45, 46]. We carried out 4C-seq by using  
369 *Hoxd4* as a viewpoint and noticed that in proximal cells, contacts established by  
370 *Hoxd4* clearly extended over the centromeric part of the cluster in the mutant allele, in  
371 agreement with the gain of H3K27me3. These contacts were also observed, though to

372 a slightly lesser extent, in mutant distal cells, again correlating with the persistence of  
373 H3K27me3 marks (Fig. 6C, arrow in track 4).

374

## 375 **DISCUSSION**

376 During limb development, the two TADs associated with the *HoxD* cluster are  
377 either transcriptionally active or repressed, in an exclusive manner. Initially, T-DOM  
378 enhancers are active and control the first wave of *Hoxd* transcription in early limb  
379 buds and, subsequently, in proximal structures such as the forearms [33]. In a second  
380 phase, C-DOM enhancers become activated in distal limb (the future hands and feet)  
381 while T-DOM concomitantly terminates operating and becomes covered by negative  
382 H3K27me3 marks [33, 38]. This bimodal regulation in TAD activities is necessary to  
383 organize each of the proximal and distal *Hox* expression domains, which are essential  
384 for proper limb development [47–50].

385

### 386 **A fused neoTAD**

387 Studies addressing the mechanism underlying the functional switch between  
388 these two TADs have suggested that in this particular case, TADs could represent  
389 coherent and independent regulatory units, i.e. that the 3D structure itself may  
390 participate to the global functional output of the system. In this view, a TAD could be  
391 either functionally permissive or refractory to the implementation of all the enhancers  
392 it may contain [32] thus representing an additional regulatory layer. In the case of T-  
393 DOM and C-DOM, only one of them is licensed to work at a time since the presence  
394 of HOX13 proteins, partly determined through the activation of C-DOM, leads to the  
395 repression of T-DOM [32]. We thus wondered how this functional exclusivity would  
396 translate after the fusion of the two structures, in a situation where both proximal and



397 distal enhancers would be included in the same neoTAD. In this neoTAD indeed,  
398 several enhancers normally present in C-DOM, i.e. with a distal specificity, were now  
399 located along with enhancers normally displaying a proximal specificity due to their  
400 location within T-DOM. Since their genuine target genes (*Hoxd*) were absent, we  
401 assessed their functionality by using three transcription units as readouts: an eRNA  
402 encoded by Island3 within former C-DOM, the *Hog* and *Tog* lncRNAs encoded  
403 within former T-DOM and a *Hoxd9/lacZ* reporter transgene positioned exactly  
404 between the former two TADs.

405         The analysis of *lacZ* mRNA revealed the presence of distinct proximal and  
406 distal expression domains, suggesting that the presence of the two kinds of enhancers  
407 in the same neoTAD did not drastically affect neither their global functional  
408 specificities, nor their mode and sequence of action. However, the proximal domain  
409 was distinct from what is normally observed in wild type limbs, despite the remaining  
410 presence of all known proximal enhancers in the two deleted alleles. In fact, it  
411 resembled in its position and shape to the expression domain of the lncRNA *Hog*,  
412 which lies in the vicinity of proximal enhancers within T-DOM. In this case, the  
413 absence of target genes and their associated CTCF sites may have led reallocations in  
414 enhancer-promoters contacts, as also suggested by the upregulation of *Hog* and *Tog*  
415 lncRNAs in proximal mutant cells. Therefore, the final transcription readout of T-  
416 DOM enhancers may slightly vary in space and time depending on how the target  
417 promoters are organized and on their local topology. Furthermore, *Hog* and *Tog*  
418 transcripts were scored in mutant distal cells, while completely switched off in control  
419 distal cells. We interpret this as a response to the remaining C-DOM enhancers, in the  
420 absence of the TAD boundary. Also, the repression of T-DOM in mutant distal cells  
421 was not implemented as efficiently as in control cells, thus contributing to this light

422 up-regulation. Housekeeping genes located within or in the vicinity of former T-  
423 DOM, such as *Mtx2*, *Hnrnap3* or *Atf2*, were left transcriptionally unaffected after  
424 fusion of the TADs, as these genes were not able to respond to the liberated  
425 enhancers.

426 In parallel with the maintenance, in the neoTAD, of proximal enhancer  
427 activity in distal cells, the level of *Island3* eRNA was slightly reduced. While this  
428 RNA was present in control distal cells but absent from control proximal cells, the  
429 same regulatory region, after TAD fusion, showed a diminution of its transcriptional  
430 activity, as if the neoTAD was globally pushed towards a proximal type of regulation.  
431 A clear distal domain was nevertheless detected with the *lacZ* expression pattern,  
432 demonstrating the activity of at least some distal limb enhancers and hence the  
433 reduction in *Island3* eRNA may also be caused by the deletion of some distal  
434 enhancers in the neoTAD.

435 This tendency of the neoTAD to adopt a type of regulation, which generally  
436 speaking appeared more proximal than distal, was reinforced by the analyses of  
437 chromatin marks. In distal cells, the fusion between the two TADs was indeed  
438 accompanied by a decrease in H3K27ac coverage in several enhancers located in  
439 former C-DOM. In contrast, H3K27ac marks in mutant distal cells were more  
440 abundant in the former T-DOM region, i.e. over proximal enhancers, than in control  
441 distal cells where these marks rapidly disappear [33]. In general terms, however,  
442 H3K27ac deposition associated to enhancer activation in mutant cells was still  
443 observed as in control cells, indicating that former T-DOM enhancers were still active  
444 in proximal limb bud cells and former C-DOM enhancers in distal cells. The  
445 difference was observed in the balance between these two types of regulations, rather  
446 than in their implementation.

447           The profile of H3K27me3 marks again confirmed these observations. In  
448 distal cells, i.e. in cells where T-DOM is normally inactive and hence most of the  
449 TAD is decorated with such marks, the amount of H3K27me3 was significantly  
450 reduced in mutant *versus* control cells, as if the ‘proximal regulation’ had not been  
451 entirely switched off, even in distal cells. In parallel with both the decrease of Island3  
452 eRNAs and the decrease in H3K27ac, the distribution of H3K27me3 marks appeared  
453 increased in the former C-DOM region.

454           Altogether, these results suggest that when mixed into a single neoTAD, the  
455 proximal regulation tends to take the lead over the distal regulation, with proximal  
456 enhancers that are active for too long, even in distal cells where distal limb enhancers  
457 seem to be somewhat under-active. A potential mechanism may involve the reported  
458 effect of HOX13 proteins in the termination of T-DOM regulation, combined with the  
459 novel chromatin architecture of the neoTAD. In the absence of HOXD13 proteins,  
460 deleted from the neoTAD, the dose of HOXA13 should be sufficient to secure the  
461 repression of T-DOM and thus to implement the switch in regulations [32]. However,  
462 the new chromatin configuration of this part of T-DOM when included in the neoTAD  
463 may affect the negative function of HOXA13, leading to a partial inhibition only and  
464 hence to an improper switch off of proximal enhancers.

465           Nonetheless, this leakage in the strict regulatory switch observed at this locus  
466 under normal conditions does not prevent the two large proximal and distal expression  
467 domains to form, with the negative cellular domain in between, which is the landmark  
468 of a correct bimodal regulation at the *HoxD* locus. One possibility to consider is that  
469 in the neoTAD, the CS38-41 region induced an internal boundary between a large and  
470 novel chromatin domain containing parts of both C-DOM and T-DOM on the one  
471 hand, and the same telomeric sub-TAD in the wild type configuration, which contains

472 most proximal enhancers as judged from chromatin modifications and 4C contacts  
473 profiles [15, 33]. Therefore, it is possible that this intra-TAD boundary allows for  
474 some isolation between proximal and distal enhancers to be conserved in the deletion  
475 mutant, as seems to be the case in the control situation. Further deletion of this  
476 boundary region including the CTCF sites should be indicative in this respect.

477

#### 478 **TAD-specific and long-range effect of PRC silencing**

479 Our results also provide some indications as to how PRC silencing propagates  
480 either *in-cis* at a distance or through cell divisions (see [51]). Within the *HoxD* cluster  
481 itself, we show that PRC2 recruitment selectively occurs at the CpG islands, as  
482 previously proposed (e.g. [24, 25, 52]. In addition, however, H3K27me3 marks were  
483 found throughout the T-DOM (over ca. 800Kb) in distal cells, where proximal  
484 enhancers have terminated their function, even though H3K27me3 marks were shown  
485 not to spread outside the *HoxD* cluster in a linear manner [53]. In the *del(attP-*  
486 *Rel5)d9lac* deletion, in the almost complete absence of CpG islands in and around the  
487 *HoxD* cluster, the enrichment by H3K27me3 marks in T-DOM was severely reduced  
488 in distal cells, indicating that indeed the recruitment of PRC2 complexes over the  
489 *HoxD* cluster was mandatory to start covering the telomeric regulatory landscape by  
490 H3K27me3 marks, concomitantly to its functional inactivation. Some H3K27me3  
491 coverage was nevertheless detected in C-DOM and more substantially in T-DOM,  
492 perhaps due to the presence of both the *Hoxd9/lacZ* reporter transgene and the *Hog*  
493 and *Tog* transcription start sites.

494 Of note, the coverage by H3K27me3 marks in control distal cells outside the  
495 *HoxD* cluster itself, i.e. in a region that is not particularly enriched in PRC2, exactly  
496 matched the extent of the TAD containing those *Hoxd* genes inactivated in distal cells

497 and hence heavily covered by PRC2, PRC1 and H3K27me3 (T-DOM). Such an effect  
498 was not scored in any other region in the 10Mb surrounding the *HoxD* locus. This  
499 result suggests that the global inactivation of T-DOM regulation in distal cells [32] is  
500 accompanied by a TAD-specific coverage of H3K27me3 marks, up to the telomeric  
501 TAD boundary where the presence of these negative marks abruptly stops (see also  
502 [54, 55]). Therefore, the TAD structure itself may dictate the extent of coverage by  
503 H3K27me3 marks, after recruitment of PRC2 by those *Hoxd* genes switched off in  
504 these distal cells and included into this TAD. In this view, the TAD (T-DOM) may be  
505 seen as a global functional unit.

506

#### 507 **Heritability of Polycomb-associated gene silencing**

508 During the replication of H3K27me3-labeled DNA sequences, daughter cells  
509 inherit this histone modification from their parental cell [51, 56, 57] Since limb  
510 development occurs mainly through a distal outgrowth, most distal cells, i.e. those  
511 where C-DOM regulation is at work, derive from proximal cells that used to be under  
512 the control of T-DOM enhancers. In the latter cells, the central part of the *HoxD*  
513 cluster is active and hence *Hoxd9*, *Hoxd10* and *Hoxd11* are devoid of H3K27me3  
514 marks, whereas *Hoxd12* and *Hoxd13*, which are located on the other side of the TAD  
515 boundary are silent and thus covered by H3K27me3 marks [33].

516 When these cells become distal and start to implement the C-DOM regulation,  
517 H3K27me3 marks are erased from both *Hoxd13* and *Hoxd12*, the major targets of C-  
518 DOM enhancers, which are transcribed at high levels. Because *Hoxd11* and *Hoxd9* are  
519 devoid of H3K27me3 marks, they also become transcribed in distal cells, even though  
520 their genuine function in these cells has not been unequivocally demonstrated [37]. In  
521 the absence of T-DOM regulation in *inv(attP-Itga6)* proximal mutant cells, the entire

522 *HoxD* cluster is heavily covered by H3K27me3 marks since all *Hoxd* genes are  
523 silenced. When these mutant distal cells start to implement the C-DOM regulation, the  
524 H3K27me3 marks covering *Hoxd13* and *Hoxd12* are removed with the same kinetics  
525 as in wild type distal cells, due to a comparable transcriptional context. However,  
526 *Hoxd11* and *Hoxd10* transcription onset is severely delayed when compared to control  
527 distal cells, as these genes were inherited in a silenced state, covered by H3K27me3  
528 marks [33]. In this latter case, the strength of distal limb enhancers and the proximity  
529 of *Hoxd13* and *Hoxd12* likely leads to a progressive removal of PRC silencing and a  
530 weak and delayed activation of both *Hoxd11* and *Hoxd10* in distal cells. This  
531 observation illustrates both the capacity for cells to memorize their coverage in  
532 H3K27me3 marks in a physiological context, and the labile aspect of Polycomb  
533 silencing, which can be efficiently removed through a strong transcriptional  
534 activation.

535

## 536 CONCLUSIONS

537 From this study, we conclude that proximal and distal limb enhancers,  
538 which are normally segregated between the two TADs flanking the *HoxD* cluster,  
539 were not dramatically affected neither in their activation, nor in their specificity, when  
540 their target genes were deleted and the two TADs merged into a single chromatin  
541 interaction domain. However, the modification in chromatin architecture occurring  
542 after the fusion of the two TADs affected the silencing of some enhancers and  
543 extended their activity over time. These results also suggest a mechanism whereby  
544 enhancer silencing is accompanied by a far-*cis* action of Polycomb group proteins  
545 after being recruited for the most part at target genes. Lastly, we conclude that active  
546 genes are more readily amenable to a subsequent enhancer regulation compared to

547 silenced genes, illustrating the potential importance of Polycomb associated  
548 chromatin marks in the proper timing of gene activation during developmental.

549

## 550 LEGENDS TO FIGURES

551 **Fig. 1.** 3D-representation of the *HoxD* locus in control (*Wt*) and mutant limb buds.

552 (A) Hi-C map showing the distribution of TADs on either side of the *HoxD* locus in

553 proximal limb and its associated genes (grey boxes) and regulatory regions (black and

554 red boxes). The dashed rectangle illustrates the deletion in the *del(attP-Rel5)d9lac*

555 allele. (B) Three-dimensional modeling of *HoxD* associated TADs derived from Hi-C

556 datasets obtained from wild type (*Wt*) proximal (top) and distal (bottom) limb bud

557 cells (schemes on the left). (C) Comparative modeling from the *del(attP-Rel5)d9lac*

558 mutant proximal (top) and distal (bottom) limb bud cells. The red disk shows the

559 position of region CS38-41 to be used as a reference point in all representations. T-

560 DOM and C-DOM are indicated in panels A and B. The TADkit tool was used to

561 model Hi-C datasets from [34].

562

563 **Fig. 2.** Transcript profiles at the *HoxD* locus in both control (*Wt*) and *del(attP-*

564 *Rel5)d9lac* mutant limb buds. (A, B) Normalized RNA-seq profiles of control (*Wt*)

565 and mutant proximal (A) and distal (B) limb cells. Values from forward (red) and

566 reverse (blue) strands are merged into the same graph. The positions of various genes

567 and of Island3 are shown below. The thick grey lines depict the *del(attP-Rel5)d9lac*

568 deletion. The isolated signal around *Hoxd9* in the second tracks in A and B arises from

569 the *Hoxd9/lacZ* reporter transgene present in the mutant line. The scale is set such that

570 changes in non-coding regions can be better observed.  $n=3$ . (C) WISH of Island3

571 eRNA in both *del(attP-Rel5)d9lac* and wild type E12.5 forelimbs. qPCR values

572 (mean±SD) are shown on the top of each image.  $n=6$  for *Wt* and  $n=4$  for *del(attP-*  
573 *Rel5)d9lac*. (D) Schemes of the various deleted regions of the mutant lines used in  
574 panels A to E. (E) qPCR of Island3 eRNAs in E12.5 distal limb cells in two distinct  
575 partial deletions of C-DOM. The mutant lines used were *del(SB1-Atf2)* ( $n=4$ ) and  
576 *del(Rel1-Rel5)* ( $n=9$ ), both balanced by the *del(Rel5-Atf2)* ( $n=12$ ) allele (where  
577 Island3 is deleted, abbreviated by  $\Delta$  in the legend). Results were compared to  
578 *del(Rel5-Atf2)/+* samples as controls (white bar). Bars show mean  $\pm$  SD. Welch's *t*-  
579 test \*\*  $p=0.0026$  and \*\*\*  $p<0.0001$ .

580

581 **Fig. 3.** Distribution of H3K27ac (A, B) and H3K27me3 (C, D) marks over the *HoxD*  
582 cluster and its flanking TADs in both control (*Wt*) and *del(attP-Rel5)d9lac* proximal  
583 (A, C) and distal (B, D) limb bud cells. (A, B) H3K27ac ChIP profiles from proximal  
584 (A) and distal (B) limb cells. Control is on top and the *del(attP-Rel5)d9lac* profile is  
585 shown below along with the difference of deleted versus control ChIP data (*del vs*  
586 *Wt*). The arrowhead in A depicts the shared *Hog* and *Tog* start site (see also the  
587 divergent arrows below). The arrow in B indicates the CS93 enhancer. (C, D)  
588 H3K27me3 ChIP profiles from proximal (C) and distal (D) limb bud cells. Control is  
589 on top and the *del(attP-Rel5)d9lac* track is shown below along with a comparison  
590 profile showing the difference between mutant and wild-type profiles. The data were  
591 averaged between different experiments ( $n$  is shown on the right). The red asterisks  
592 indicate artifactual peaks. The signal from the *Hoxd9* region in the deleted allele  
593 corresponds to the *Hoxd9/lacZ* transgene.

594

595 **Fig. 4.** Distribution of PRC1 (RING1B) and PRC2 (EZH2) over the *HoxD* cluster and  
596 regulatory landscapes in limb bud cells. (A) EZH2 and RING1B ChIP profiles in



597 proximal (top two panels) and distal (bottom two panels) E12.5 limb bud cells. The  
598 CpG distribution is shown as green bars on top of the gene diagram. The red asterisk  
599 indicates an artifactual signal. (B) Magnification of the *HoxD* cluster showing the  
600 distribution of EZH2 and RING1B in proximal and distal limb cells. H3K27me3 ChIP  
601 tracks are shown for each tissue. The CpG islands are shown as green bars and the  
602 CTCF and their orientations are depicted as blue (reverse strand) or red (forward  
603 strand) arrowheads.

604

605 **Fig. 5.** Epigenetic changes after disconnecting the *HoxD* cluster from its flanking T-  
606 DOM. (A) On top, a Hi-C profile of distal limb bud cells shows the *HoxD*-associated  
607 TADs. The panels below show a comparison of 4C-seq tracks between control (*Wt*  
608 from [34]) and *inv(attP-Itga6)* mutant distal limb cells. Either the *Hoxd4* gene (top  
609 two panels), or the CS38 region (bottom two panels), was used as baits (yellow  
610 vertical bars). The red bars indicate the locations of the loxP sequences used to  
611 generate the inversion. After inversion, contacts between *Hoxd4* and T-DOM are all  
612 lost, while they barely change when region CS38 is used as bait. (B) H3K27me3 ChIP  
613 profiles in control (*Wt*) and either the *inv(attP-Itga6)* inversion (top two profiles), or  
614 the *inv(Nsi-Itga6)* inversion (bottom two profiles). Below each mutant track, a  
615 comparison between mutant and control data is shown. The red bars indicate the  
616 inversion break points. In the *inv(attP-Itga6)* track, an additional peak appears at the  
617 5' extreme of the *HoxD* cluster (black asterisk), corresponding to an ectopic sequence  
618 introduced when building the attP breakpoint. The red asterisk indicates an artifactual  
619 signal. The number of replicates is shown for each track. Below each mutant track, a  
620 difference profile of mutant *versus* control signals is represented.

621

622 **Fig. 6.** *Hoxd* gene expression in limbs in the absence of T-DOM. (A) Normalized  
623 RNA-seq profiles of control (*Wt*) and *inv(attP-Itga6)* mutant proximal (A) or distal  
624 (B) limb bud cells. Black arrows indicate the decreased RNA quantity over *Hoxd12*  
625 and *Hoxd11* in distal tissue (bottom two tracks) while expression has almost fully  
626 disappeared in proximal limb cells (top two tracks). (B) WISH of *Hoxd4*, *Hoxd8*,  
627 *Hoxd9*, *Hoxd11*, *Hoxd13* and *Evx2* in E12.5 forelimb buds. The arrowheads indicate  
628 digits II and V. (C) On the left, comparison of H3K27me3 signal over the *HoxD*  
629 cluster in either proximal (top two tracks) or distal (bottom two tracks) between  
630 control (*Wt*) and mutant *inv(attP-Itga6)* specimen. The CTCF sites are shown below.  
631 The arrows point to the extension of the H3K27me3 negative domain over the  
632 *Hoxd11* region in mutant *inv(attP-Itga6)* distal cells (fourth track), when compared to  
633 control cells (third track). In the right, 4C-seq tracks showing interactions inside the  
634 *HoxD* cluster when *Hoxd4* is used as bait (*Wt*: data from [34]). The arrows indicate a  
635 robust gain of interaction over *Hoxd11* to *Hoxd12* region in *inv(attP-Itga6)* mutant  
636 distal cells.

637

### 638 **ADDITIONAL FILES**

639 Additional\_File\_1.pdf

640 Additional\_File\_2.pdf

641 Additional\_File\_3.pdf

642 Additional\_File\_4.pdf

643

644 **Additional File 1.** 3D-representation of the *HoxD* locus in control (*Wt*) and *del(1-*  
645 *13)d9lac* mutant limb buds. (A) Hi-C map showing the presence of both TADs on  
646 either side of the *HoxD* locus in distal limb cells and its associated genes (grey boxes)

647 and regulatory regions (black and red boxes). The dashed rectangle illustrates the  
648 deletion in the *del(1-13)d9lac* allele. (B, C) TADkit-derived 3D representation of Hi-  
649 C datasets [34] obtained for distal (B) and proximal (C) limb cells processed from  
650 *del(1-13)d9lac* mutant mice. The CS38-41 region is shown as a red disk in the 3D  
651 models to be used as a reference point. In this deletion allele, both TADs are still  
652 visible unlike in the larger *del(attP-Rel5)d9lac* deletion shown in Fig. 1. (D) A/B  
653 compartment distribution along chromosome 2. Eigenvectors were calculated from *Wt*  
654 and *del(attP-Rel5)d9lac* E12.5 distal and proximal limb Hi-C data. Compartment A is  
655 represented as positive values (red) and compartment B as negative values (blue).  
656 Gene density is shown in the bottom panel and the *HoxD* locus is indicated as a blue  
657 bar.

658

659 **Additional File 2.** Expression analysis around the *HoxD* associated transcripts. (A)  
660 WISH of *lacZ* mRNA in *del(attP-Rel5)d9lac* and *del(1-13)d9lac* E11.5 forelimbs  
661 (right) and whole embryos (left). The proximal domain is shown by an arrowhead. (B)  
662 WISH of Island3 eRNAs in *Wt* and *del(attP-Rel5)d9lac* E12.5 embryos where the  
663 antisense probe was used (left) showing the specificity on the digital region. On the  
664 right, a probe control shows the lack of staining with the Island3 sense probe. (C, D)  
665 Volcano plots of all genes analyzed by RNA-seq in proximal (C) and distal (D) limb  
666 tissues comparing *del(attP-Rel5)d9lac* expression values to the control. All the genes  
667 located inside or in the vicinity of C-DOM and T-DOM are marked in red. Blue dots  
668 represent differentially expressed genes (absolute log<sub>2</sub> fold change above 1.5 and  
669 adjusted p-value below 0.05) that are located outside these regions. *Hoxd9* and  
670 *Gm28793* (a short antisense mRNA) are significantly expressed due to their presence  
671 inside the *Hoxd9/LacZ* transgene.

672

673 **Additional File 3.** H3K27me3 distribution after disconnecting the *HoxD* from its T-  
674 DOM regulatory landscape. (A) Scheme of the *inv(attP-Itga6)* and *inv(Nsi-Itga6)*  
675 mutant lines. On top, a Hi-C profile from limb cells above the distribution of genes  
676 (grey) and regulatory regions (black) (chr2:71,240,000-76,320,000). The positions of  
677 both C-DOM and T-DOM are shown by brackets. In the *inv(Nsi-Itga6)* allele, an  
678 inversion is generated between the *Itga6* and the *attP* breakpoints [42] separating the  
679 *HoxD* cluster from T-DOM. In the *inv(Nsi-Itga6)* allele, the inversion occurs between  
680 the *Itga6* and the *Nsi* breakpoints [43] and hence the *HoxD* cluster remains in contact  
681 with T-DOM. In the latter inversion, a *Hoxd11lac* transgene (green flag) is inverted  
682 along. (B) H3K27me3 ChIP profiles from proximal limb bud cells derived from either  
683 Wild-type, *inv(attP-Itga6)* or *inv(Nsi-Itga6)* specimens. The *n* indicates the number of  
684 replicates for each track. Below each mutant dataset, a comparison of mutant *versus*  
685 control is shown. A red asterisk in the control track indicates an artifactual signal at  
686 the position of island-3.

687

688 **Additional File 4.** (A) H3K27me3 coverage outside the *HoxD* locus in distal limb bud  
689 cells from either control (*Wt*) or *del(attP-Rel5)d9lac* specimens. A corresponding Hi-  
690 C map is shown on top spanning ca. 10 megabases and centered around the *HoxD*  
691 cluster (blue box), with the related TAD structures (chr2:69,600,001-79,440,000). The  
692 flanking C-DOM and T-DOM TADs are indicated. H3K27me3 ChIP profiles in  
693 control cells show a global coverage outside the *HoxD* cluster precisely restricted to  
694 the T-DOM TAD. In *del(attP-Rel5)d9lac* mutant distal limb cells, the enrichment is  
695 much weaker. Below is the difference in the ChIP datasets comparing mutant *versus*  
696 control signals. The red asterisks point to an artifactual signal. (B) Quantification of

697 H3K27me3 ChIP signal of Wild-type, *del(attP-Rel5)d9lac* and *inv(Nsi-Itga6)* in distal  
698 (left) or proximal (right) forelimb cells. The plotted values are computed from the  
699 regions depicted in (A) as dashed boxes.

700

701 **Additional File 5.** H3K27me3 signal over the *HoxD* cluster in the absence of C-  
702 DOM. H3K27me3 ChIP profiles in distal (top two tracks) and proximal (bottom two  
703 tracks) limb bud cells, either in control (*Wt*) or in *inv(Nsi-Itga6)* mutant specimen.  
704 Below are shown the difference profiles. The increase of signal in *Hoxd11* represents  
705 reads coming from the *Hoxd11lac* transgene included in the inversion allele  
706 (represented by a shaded grey box).

707

## 708 **METHODS**

### 709 **Animal experimentation and mouse strains**

710 Genetically modified mice were kept on a (Bl6XCBA) background and crossed in  
711 heterozygosis. Distal and proximal forelimb tissues were dissected and processed  
712 from E12.5 mouse embryos. All mutant mice used in this study and their genotyping  
713 strategies have been previously described in [34, 38, 42]. Homozygous mutant  
714 embryos were obtained by crossing heterozygous mice.

715

### 716 **3D Modeling of Hi-C datasets**

717 Hi-C original datasets from wild type, *HoxD<sup>del(1-13)d9lac</sup>* and *HoxD<sup>del(attP-Rel5)d9lac</sup>* were  
718 obtained from [34] (GEO accession: GSE101715). Three-dimensional modeling of  
719 the normalized 40kb binned Hi-C matrices was performed by means of the  
720 `model_and_analyze.py` script from the TADbit v0.2.0.58 software [36] in chr2:  
721 73800001-75760000 (wild-type coordinates mm10). We generated 500 models for

722 optimization and 5000 for modelling and we did not filter out matrix columns  
723 showing no interactions. We visualized the model with TADkit using the Virtual  
724 Research Environment (<https://vre.multiscalegenomics.eu>). Region CS38-41 (wild-  
725 type coordinates in mm10, chr2:75120051-75165771) was used as a reference mark in  
726 the 3D reconstructed Hi-C model.

## 727 **RNA extraction, RNA-seq and qPCR**

728 Limb tissue was dissected, placed in RNAlater (Invitrogen) and directly frozen at -  
729 80°C until further processing. After genotyping, RNA was extracted from individual  
730 samples using RNAeasy Micro Kit (QIAGEN). For RNA-seq, a total of three  
731 different biological replicates per tissue and genotype were processed. Libraries were  
732 prepared from 100ng of total RNA using the TruSeq Stranded mRNA protocol and  
733 sequenced on a HiSeq 2500 machine (100-bp reads, single end). Sequencing data  
734 were treated using the facilities of the Scientific IT and Application Support Center of  
735 EPFL. The gtf file used for STAR and cufflinks, based on Ensembl version 94  
736 annotations, is available on figshare [58]. Adapters were removed using cutadapt  
737 (v1.16) and aligned onto mm10 using STAR [59] with ENCODE parameters. DESeq2  
738 analysis was performed with default parameters and genes with absolute log2 fold  
739 change above 1.5 and p-value below 0.05 were considered as significant ([60] version  
740 1.22.1). For *HoxD<sup>del(attP-Rel5)d9lac</sup>*, three biological replicates were used for each  
741 genotype and tissue. For *HoxD<sup>inv(attP-Itga6)</sup>* only one sample was used per tissue and  
742 genotype. Track profiles show the mean of the coverage of uniquely mapped reads  
743 normalized to the number of uniquely mapped reads. They were obtained with the  
744 UCSC browser. For qPCR, purified RNA was retrotranscribed with Promega  
745 GoScript Reverse Transcriptase (Promega). Custom SYBR probes were used for  
746 quantitative real-time PCR (qPCR) in a QuantStudio 5 384-well block machine.

747 Island3 primers were Forward: TTCCATCACAGGAGAGTCGTTG and Reverse:  
748 AGGTGGGAACATGGACTGAAAG. All other primers were described in [37, 61].

749

#### 750 **4C-seq experiments**

751 The limb samples used in this study were dissected from E12.5 forelimb buds for all  
752 wild type and mutant lines. Samples were processed as in [34]. Briefly, cellular  
753 suspensions were filtered and fixed using a 2% Formaldehyde/10% FBS/PBS solution  
754 for 10 minutes. NlaIII (NEB) was used as a first cutter and DpnII (NEB) as a second  
755 cutter. DNA libraries were prepared using twelve to fourteen independent PCR  
756 reactions with 100ng DNA on each. Sequencing was performed by multiplexing  
757 several independently barcoded viewpoints. 4C-seq data were analyzed using the  
758 HTSstation web interface [62]. They were normalized to the distribution of reads on a  
759 10Mb window and profiles were smoothed using a window of 11 fragments. 4C-seq  
760 data from wild type tissue was taken from GEO (GSE101717). Data for the CS38  
761 viewpoint were taken from GSM2713679 and for the *Hoxd4* viewpoint from  
762 GSM2713671 and GSM2713672.

763

#### 764 **Chromatin immuno-precipitation (ChIP)**

765 For all samples, limb tissues were dissected and directly fixed with 1% formaldehyde  
766 in PBS for 10 minutes at room temperature, followed by 3 minutes incubation with  
767 Stop Solution from the ChIP-IT High sensitive kit (Active Motif). Samples were then  
768 washed 3 times with working Washing Solution (ChIP-IT, Active Motif) and then  
769 snap-frozen in liquid nitrogen and stored at -80°C until further processing. After  
770 genotyping, samples were pooled according to the required cell number. The total  
771 amount of tissue used for each line was different due to the size variations of the limb

772 buds. Limb tissues were disrupted with a polytron device, lysed in RIPA buffer or  
773 Prep Buffer (ChIP-IT, Active Motif) and sonicated in Diagenode Bioruptor Pico. All  
774 H3K27ac ChIP experiments were processed as ChIP-seqs using the reagents from  
775 ChIP-IT High Sensitive kit (Active Motif). IPs were performed in parallel technical  
776 duplicates with 11 to 14µg of chromatin on each. Antibody incubation was performed  
777 overnight on a final volume of 1.5-2ml dilution buffer (0.1% SDS, 50mM Tris-HCl  
778 pH8, 10mM EDTA pH8 and proteinase inhibitors), including 2µl of H3K27ac  
779 antibody (Diagenode C15410196) at 4°C on a rotating platform. Agarose beads were  
780 added for 3 to 4h at 4°C. Washes were performed on column and DNA purification  
781 was carried out by phenol-chloroform extraction. The technical replicates were  
782 merged and yielded 1.5 to 2ng of chromatin, which were used to generate DNA  
783 libraries using the TruSeq ChIP library preparation kit. RING1B ChIP experiments  
784 were processed as for ChIP-seq using 4µl of RING1B antibody (Active Motif 39664)  
785 and following the protocol described in [32].

786 All H3K27me3 and EZH2 ChIP were performed following the ChIPmentation  
787 protocol [63]. Around 0.1 to 0.4 million cells were used for each IP on a final volume  
788 of 800 to 1000µl of RIPA-LS buffer (10mM Tris-HCl pH8, 140mM NaCl, 1mM  
789 EDTA pH8, 0.1% SDS, 0.1% sodium deoxycholate, 1% Triton x-100 and proteinase  
790 inhibitors), to which 2µl of H3K27me3 (Millipore 17-622) or EZH2 (Diagenode  
791 C15410039) antibodies were added. Samples were incubated for at least 2 hours with  
792 Dynabeads Protein A (Invitrogen 10001D) rotating at 4°C. Washes were performed as  
793 follows: two times RIPA-LS, two times RIPA-HS (10mM Tris-HCl pH8, 500mM  
794 NaCl, 1mM EDTA pH8, 0.1% SDS, 0.1% sodium deoxycholate, 1% Triton x-100 and  
795 proteinase inhibitors), two times RIPA-LiCl (10mM Tris-HCl pH8, 250mM LiCl,  
796 1mM EDTA pH8, 0.5% NP-40, 0.5% sodium deoxycholate and proteinase inhibitors)



797 and once with 10mM Tris-HCl pH8. Beads were resuspended in 24µl of tagmentation  
798 buffer (10mM Tris pH8, 5mM MgCl<sub>2</sub>, 10% dimethylformamide) and 1µl of Tn5  
799 transposase (Illumina 15027865, from Nextera DNA Library Prep Kit 15028212) and  
800 transferred to PCR tubes, which were then incubated at 37°C for five minutes in a  
801 thermocycler. Samples were then resuspended and washed twice in 1ml of RIPA-LS  
802 and twice in 1ml TE buffer (10mM Tris-Hcl pH8, 1mM EDTA pH8). Beads were  
803 magnetised, DNA was eluted in ChIP elution buffer (10mM Tris-HCl pH8, 5mM  
804 EDTA pH8, 300mM NaCl, 0.4% SDS) with 2µl of proteinase K (20mg/ml stock) and  
805 then incubated for 1 hour at 55°C and 6 hours to overnight at 65°C. After de-  
806 crosslinking, the supernatant was recovered and beads were resuspended again in 19µl  
807 ChIP elution buffer with 1µl of proteinase K and left 1 hour at 55°C. The two  
808 supernatants were combined and purified with MinElute kit (Qiagen) in 22µl of EB  
809 buffer. Relative quantitation was performed using SYBR-green (as in [63]) using 2µl  
810 of DNA. Libraries were amplified according to the Cq values obtained in the previous  
811 step (12 to 14 cycles for both sets of samples), purified using Agentcourt AMPureXP  
812 beads (Beckman Coulter A63880) and eluted in 15µl of water. DNA sequencing was  
813 performed in HiSeq 2500 or HiSeq 4000 machine as 50bp single reads or 100bp  
814 single reads.

815

### 816 **ChIP analysis.**

817 Analyses were performed using the facilities of the Scientific IT and Application  
818 Support Center of EPFL. Sequences were filtered and adapters were removed using  
819 cutadapt (v1.16) [64] with parameters -m 15 -q 30 -a  
820 CTGTCTCTTATACACATCTCCGAGCCCACGAGAC for ChIPmentation and -a  
821 GATCGGAAGAGCACACGTCTGAACTCCAGTCAC for ChIP-seq. Reads were

822 mapped on mm10 using bowtie2 (v2.3.4.1) using default parameters [65]. Only reads  
823 with a mapping quality above 30 were kept. A profile was obtained with macs2 [66]  
824 (version 2.1.1.20160309 option `-extsize 300`). Bedgraphs were normalized to their  
825 number of million tags used in the profile and replicates were merged using the tool  
826 unionbedg (bedtools v2.27) [67]. Profiles were loaded in the UCSC browser with  
827 windowing function as mean. The difference profiles were calculated using  
828 unionbedg. In order to quantify the gain or loss of chromatin marks in the C-DOM, T-  
829 DOM, and in the CS38-41 region, the number of reads falling into their respective  
830 intervals (chr2:73914154-74422050 for C-DOM, chr2:74781516-75605516 for T-  
831 DOM, and chr2:75120051-75165771 for the CS38-41 region) were assessed after  
832 duplicate removal by picard (<http://broadinstitute.github.io/picard/> version 2.18.14)  
833 using the multiBamSummary function from deeptools [68]. For the C-DOM, the reads  
834 falling into the region of the artifactual peak, which is due to a PCR contamination  
835 (chr2:74207282-74208158), were excluded in all datasets. The counts were  
836 normalized to the number of reads in the input bam file and the significance was  
837 assessed by the function `wilcox.test` in R (<https://www.R-project.org>).

838

### 839 **Whole-mount *in situ* hybridization (WISH) and beta-galactosidase staining**

840 *Island3*, *Hoxd4*, *Hoxd8*, *Hoxd9*, *Hoxd11*, *Hoxd13* and *Evx2* WISH were performed  
841 following the protocol described in [69]. The DNA fragment for *Island3* probe was  
842 amplified from purified genomic DNA using primers  
843 GCAGGAATGACAGACAGGCA (Fw) and ACAGAGGTGGGAACATGGAC (Rv)  
844 and cloned into pGEM-T easy vector (Promega A1360). Beta-galactosidase staining  
845 was performed as in [34]. *Hoxd4*, *Hoxd8*, *Hoxd9*, *Hoxd11*, *Hoxd13* and *Evx2* probes  
846 were as in [70].

847

848 **ABBREVIATIONS**

849 TAD: Topologically Associating Domain; PRC: Polycomb Repressive Complex;

850 WISH: Whole-mount In Situ Hybridization; ChIP: Chromatin Immunoprecipitation;

851 eRNA: enhancer RNA; lncRNA: long non-coding RNA; C-DOM: centromeric TAD;

852 T-DOM: telomeric TAD.

853

854 **DECLARATIONS**

855

856 **Ethics approval and consent to participate**

857 All experiments were performed in agreement with the Swiss law on animal

858 protection (LPA), under license No GE 81/14 (to DD).

859

860 **Consent for publication**

861 Not applicable

862

863 **Availability of data and material**

864 The datasets generated and analyzed for this study are available in the GEO repository

865 under accession number GEOXXXX. Publicly available data used in this paper can be

866 found in GEO under the accession numbers GSE101715 (Hi-C) and GSE101713 (4C-

867 seq).

868

869 **Competing interests**

870 The authors declare no competing financial interests.

871

## 872 **Funding**

873 This work was supported by funds from the École Polytechnique Fédérale (EPFL,  
874 Lausanne), the University of Geneva, the Swiss National Research Fund (No.  
875 310030B\_138662) and the European Research Council grants *SystemHox* (No  
876 232790) and *RegulHox* (No 588029) (to D.D.). Funding bodies had no role in the  
877 design of the study and collection, analysis and interpretation of data and in writing  
878 the manuscript.

879

## 880 **Author's contributions**

881 Design of experiments, ERC, DD; Bench work, ERC, NYK; Computing analysis,  
882 LLD, AUA; Analysis of results, ERC, LLD, DD; Manuscript writing, ERC, DD;  
883 Manuscript correction, LLD, NYK; Funding acquisition, DD.

884

## 885 **Acknowledgements**

886 We thank Leonardo Beccari, Aurélie Hintermann, Andréa Willemin, Jozsef Zákány  
887 and other members of the Duboule laboratories for insightful comments and  
888 discussion. We also thank Bénédicte Mascrez, Sandra Gitto and Thi Hanh Nguyen  
889 Huynh for their help with mice breeding and genotyping, as well as Mylène Docquier,  
890 Brice Petit and Christelle Barraclough from the Geneva Genomics platform  
891 (University of Geneva).

892

## 893 **REFERENCES**

- 894 1. Dekker J, Belmont AS, Guttman M, Leshyk VO, Lis JT, Lomvardas S, et al. The  
895 4D nucleome project. *Nature*. 2017; 549:219–26.
- 896 2. Davies JOJ, Oudelaar AM, Higgs DR, Hughes JR. How best to identify  
897 chromosomal interactions: a comparison of approaches. *Nat Methods*. 2017;14:125–  
898 34.
- 899 3. Phillips-Cremins JE, Sauria ME, Sanyal A, Gerasimova TI, Lajoie BR, Bell JS, et

- 900 al. Architectural Protein Subclasses Shape 3D Organization of Genomes during  
901 Lineage Commitment. *Cell*. 2013; 153:1281–95.
- 902 4. Laura Vian A, Pe A, Rao SS, Levens D, Lieberman Aiden E, Casellas R, et al. The  
903 Energetics and Physiological Impact of Cohesin Extrusion. *Cell*. 2018; 173:1–14.
- 904 5. Rao SSP, Huntley MH, Durand NC, Stamenova EK, Bochkov ID, Robinson JT, et  
905 al. A 3D map of the human genome at kilobase resolution reveals principles of  
906 chromatin looping. *Cell*. 2014; 159:1665–1680.
- 907 6. Fudenberg G, Abdennur N, Imakaev M, Goloborodko A, Mirny LA. Emerging  
908 Evidence of Chromosome Folding by Loop Extrusion. *Cold Spring Harb Symp Quant*  
909 *Biol*. 2017; 82:45–55.
- 910 7. Dixon JR, Selvaraj S, Yue F, Kim A, Li Y, Shen Y, et al. Topological domains in  
911 mammalian genomes identified by analysis of chromatin interactions. *Nature*.  
912 2012;485: 376–80.
- 913 8. Nora EP, Lajoie BR, Schulz EG, Giorgetti L, Okamoto I, Servant N, et al. Spatial  
914 partitioning of the regulatory landscape of the X-inactivation centre. *Nature*.  
915 2012;485: 381–5.
- 916 9. Zhan Y, Mariani L, Barozzi I, Schulz EG, Bluthgen N, Stadler M, et al. Reciprocal  
917 insulation analysis of Hi-C data shows that TADs represent a functionally but not  
918 structurally privileged scale in the hierarchical folding of chromosomes. *Genome Res*.  
919 2017. doi:10.1101/gr.212803.116.
- 920 10. Spitz F, Gonzalez F, Duboule D. A global control region defines a chromosomal  
921 regulatory landscape containing the HoxD cluster. *Cell*. 2003; 113:405–17.
- 922 11. Harmston N, Ing-Simmons E, Tan G, Perry M, Merckenschlager M, Lenhard B.  
923 Topologically associating domains are ancient features that coincide with Metazoan  
924 clusters of extreme noncoding conservation. *Nat Commun*. 2017;8:441.
- 925 12. Ibn-Salem J, Muro EM, Andrade-Navarro MA. Co-regulation of paralog genes in  
926 the three-dimensional chromatin architecture. *Nucleic Acids Res*. 2017; 45:81–91.
- 927 13. Schmitt AD, Hu M, Jung I, Xu Z, Qiu Y, Tan CL, et al. A Compendium of  
928 Chromatin Contact Maps Reveals Spatially Active Regions in the Human Genome.  
929 *Cell Rep*. 2016; 17:2042–59.
- 930 14. Woltering JM, Noordermeer D, Leleu M, Duboule D. Conservation and  
931 divergence of regulatory strategies at Hox Loci and the origin of tetrapod digits. *PLoS*  
932 *Biol*. 2014;12:e1001773.
- 933 15. Yakushiji-Kaminatsui N, Lopez-Delisle L, Bolt CC, Andrey G, Beccari L,  
934 Duboule D. Similarities and differences in the regulation of HoxD genes during chick  
935 and mouse limb development. *PLoS Biol*. 2018;16:e3000004.
- 936 16. Nora EP, Goloborodko A, Valton AL, Gibcus JH, Uebersohn A, Abdennur N, et  
937 al. Targeted Degradation of CTCF Decouples Local Insulation of Chromosome  
938 Domains from Genomic Compartmentalization. *Cell*. 2017;169:930-944 e22.
- 939 17. Rao SSP, Huang S-C, Glenn St Hilaire B, Engreitz JM, Perez EM, Kieffer-Kwon  
940 K-R, et al. Cohesin Loss Eliminates All Loop Domains. *Cell*. 2017;171:305-320.e24.
- 941 18. Schwarzer W, Abdennur N, Goloborodko A, Pekowska A, Fudenberg G, Loe-Mie  
942 Y, et al. Two independent modes of chromatin organization revealed by cohesin  
943 removal. *Nature*. 2017;551:51–6.
- 944 19. Soshnikova N, Montavon T, Leleu M, Galjart N, Duboule D. Functional analysis  
945 of CTCF during mammalian limb development. *Dev Cell*. 2010;19:819–30.
- 946 20. Nuebler J, Fudenberg G, Imakaev M, Abdennur N, Mirny LA. Chromatin  
947 organization by an interplay of loop extrusion and compartmental segregation. *Proc*  
948 *Natl Acad Sci*. 2018;115:E6697–706.
- 949 21. Vieux-Rochas M, Fabre PJ, Leleu M, Duboule D, Noordermeer D. Clustering of

- 950 mammalian Hox genes with other H3K27me3 targets within an active nuclear  
951 domain. *Proc Natl Acad Sci U S A.* 2015;112:4672–7.
- 952 22. Larson AG, Elnatan D, Keenen MM, Trnka MJ, Johnston JB, Burlingame AL, et  
953 al. Liquid droplet formation by HP1 $\alpha$  suggests a role for phase separation in  
954 heterochromatin. *Nature.* 2017;547:236–40.
- 955 23. Strom AR, Emelyanov AV, Mir M, Fyodorov DV, Darzacq X, Karpen GH. Phase  
956 separation drives heterochromatin domain formation. *Nature.* 2017;547:241–5.
- 957 24. Cruz-Molina S, Respuela P, Tebartz C, Kolovos P, Nikolic M, Fueyo R, et al.  
958 PRC2 Facilitates the Regulatory Topology Required for Poised Enhancer Function  
959 during Pluripotent Stem Cell Differentiation. *Cell Stem Cell.* 2017;20:689-705.e9.
- 960 25. Denholtz M, Bonora G, Chronis C, Splinter E, de Laat W, Ernst J, et al. Long-  
961 range chromatin contacts in embryonic stem cells reveal a role for pluripotency  
962 factors and polycomb proteins in genome organization. *Cell Stem Cell.* 2013;13:602–  
963 16.
- 964 26. Joshi O, Wang SY, Kuznetsova T, Atlasi Y, Peng T, Fabre PJ, et al. Dynamic  
965 Reorganization of Extremely Long-Range Promoter-Promoter Interactions between  
966 Two States of Pluripotency. *Cell Stem Cell.* 2015;17:748–57.
- 967 27. Fabre PJ, Leleu M, Mormann BH, Lopez-Delisle L, Noordermeer D, Beccari L, et  
968 al. Large scale genomic reorganization of topological domains at the HoxD locus.  
969 *Genome Biol.* 2017;18:149.
- 970 28. Long HK, Prescott SL, Wysocka J. Ever-Changing Landscapes: Transcriptional  
971 Enhancers in Development and Evolution. *Cell.* 2016;167:1170–87.
- 972 29. Osterwalder M, Barozzi I, Tissières V, Fukuda-Yuzawa Y, Mannion BJ, Afzal  
973 SY, et al. Enhancer redundancy provides phenotypic robustness in mammalian  
974 development. *Nature.* 2018;554:239–43.
- 975 30. Spitz F. Gene regulation at a distance: From remote enhancers to 3D regulatory  
976 ensembles. *Semin Cell Dev Biol.* 2016;57:57–67.
- 977 31. Symmons O, Uslu VV, Tsujimura T, Ruf S, Nassari S, Schwarzer W, et al.  
978 Functional and topological characteristics of mammalian regulatory domains. *Genome*  
979 *Res.* 2014;24:390–400.
- 980 32. Beccari L, Yakushiji-Kaminatsui N, Woltering JM, Necsulea A, Lonfat N,  
981 Rodriguez-Carballo E, et al. A role for HOX13 proteins in the regulatory switch  
982 between TADs at the HoxD locus. *Genes Dev.* 2016;30:1172–86.
- 983 33. Andrey G, Montavon T, Mascrez B, Gonzalez F, Noordermeer D, Leleu M, et al.  
984 A Switch Between Topological Domains Underlies HoxD Genes Collinearity in  
985 Mouse Limbs. *Science.* 2013;340:1234167–1234167.
- 986 34. Rodriguez-Carballo E, Lopez-Delisle L, Zhan Y, Fabre PJ, Beccari L, El-Idrissi I,  
987 et al. The HoxD cluster is a dynamic and resilient TAD boundary controlling the  
988 segregation of antagonistic regulatory landscapes. *Genes Dev.* 2017;31:2264–81.
- 989 35. Sheth R, Barozzi I, Langlais D, Osterwalder M, Nemeč S, Carlson HL, et al.  
990 Distal Limb Patterning Requires Modulation of cis-Regulatory Activities by HOX13.  
991 *Cell Rep.* 2016;17:2913–26.
- 992 36. Serra F, Baù D, Goodstadt M, Castillo D, Filion GJ, Marti-Renom MA. Automatic  
993 analysis and 3D-modelling of Hi-C data using TADbit reveals structural features of  
994 the fly chromatin colors. *PLOS Comput Biol.* 2017;13:e1005665.
- 995 37. Delpretti S, Montavon T, Leleu M, Joye E, Tzika A, Milinkovitch M, et al.  
996 Multiple enhancers regulate Hoxd genes and the Hotdog lncRNA during cecum  
997 budding. *Cell Rep.* 2013;5:137–50.
- 998 38. Montavon T, Soshnikova N, Mascrez B, Joye E, Thevenet L, Splinter E, et al. A  
999 regulatory archipelago controls Hox genes transcription in digits. *Cell.*

- 1000 2011;147:1132–45.
- 1001 39. Li H, Liefke R, Jiang J, Kurland JV, Tian W, Deng P, et al. Polycomb-like  
1002 proteins link the PRC2 complex to CpG islands. *Nature*. 2017;549:287–91.
- 1003 40. Riising EM, Comet I, Leblanc B, Wu X, Johansen JV, Helin K. Gene silencing  
1004 triggers polycomb repressive complex 2 recruitment to CpG islands genome wide.  
1005 *Mol Cell*. 2014;55:347–60.
- 1006 41. Ku M, Koche RP, Rheinbay E, Mendenhall EM, Endoh M, Mikkelsen TS, et al.  
1007 Genomewide analysis of PRC1 and PRC2 occupancy identifies two classes of  
1008 bivalent domains. *PLoS Genet*. 2008;4:e1000242.
- 1009 42. Schep R, Necsulea A, Rodriguez-Carballo E, Guerreiro I, Andrey G, Nguyen  
1010 Huynh TH, et al. Control of Hoxd gene transcription in the mammary bud by  
1011 hijacking a preexisting regulatory landscape. *Proc Natl Acad Sci U A*.  
1012 2016;113:E7720–9.
- 1013 43. Tschopp P, Duboule D. A regulatory “landscape effect” over the HoxD cluster.  
1014 *Dev Biol*. 2011;351:288–96.
- 1015 44. Tabin C, Wolpert L. Rethinking the proximodistal axis of the vertebrate limb in  
1016 the molecular era. *Genes Dev*. 2007;21:1433–42.
- 1017 45. Kundu S, Ji F, Sunwoo H, Jain G, Lee JT, Sadreyev RI, et al. Polycomb  
1018 Repressive Complex 1 Generates Discrete Compacted Domains that Change during  
1019 Differentiation. *Mol Cell*. 2017;65:432-446 e5.
- 1020 46. Noordermeer D, Leleu M, Splinter E, Rougemont J, De Laat W, Duboule D. The  
1021 dynamic architecture of Hox gene clusters. *Science*. 2011;334:222–5.
- 1022 47. Davis AP, Witte DP, Hsieh-Li HM, Potter SS, Capecchi MR. Absence of radius  
1023 and ulna in mice lacking hoxa-11 and hoxd-11. *Nature*. 1995;375:791–5.
- 1024 48. Fromental-Ramain C, Warot X, Messadecq N, LeMeur M, Dolle P, Chambon P.  
1025 Hoxa-13 and Hoxd-13 play a crucial role in the patterning of the limb autopod.  
1026 *Development*. 1996;122:2997–3011.
- 1027 49. Kmita M, Tarchini B, Zakany J, Logan M, Tabin CJ, Duboule D. Early  
1028 developmental arrest of mammalian limbs lacking HoxA/HoxD gene function.  
1029 *Nature*. 2005;435:1113–6.
- 1030 50. Zakany J, Fromental-Ramain C, Warot X, Duboule D. Regulation of number and  
1031 size of digits by posterior Hox genes: a dose-dependent mechanism with potential  
1032 evolutionary implications. *Proc Natl Acad Sci U A*. 1997;94:13695–700.
- 1033 51. Reinberg D, Vales LD. Chromatin domains rich in inheritance. *Science*.  
1034 2018;361:33–4.
- 1035 52. Oksuz O, Narendra V, Lee C-H, Descostes N, LeRoy G, Raviram R, et al.  
1036 Capturing the Onset of PRC2-Mediated Repressive Domain Formation. *Mol Cell*.  
1037 2018;70:1149-1162.e5.
- 1038 53. Schorderet P, Lonfat N, Darbellay F, Tschopp P, Gitto S, Soshnikova N, et al. A  
1039 Genetic Approach to the Recruitment of PRC2 at the HoxD Locus. *PLoS Genet*.  
1040 2013;9:e1003951.
- 1041 54. Ho JWK, Jung YL, Liu T, Alver BH, Lee S, Ikegami K, et al. Comparative  
1042 analysis of metazoan chromatin organization. *Nature*. 2014;512:449–52.
- 1043 55. Le Dily F, Baù D, Pohl A, Vicent GP, Serra F, Soronellas D, et al. Distinct  
1044 structural transitions of chromatin topological domains correlate with coordinated  
1045 hormone-induced gene regulation. *Genes Dev*. 2014;28:2151–62.
- 1046 56. Escobar T, Oksuz O, Descostes N, Bonasio R, Reinberg D. Precise re-deposition  
1047 of nucleosomes on repressive chromatin domains sustain epigenetic inheritance  
1048 during DNA replication. *bioRxiv*. 2018. doi:10.1101/418707.
- 1049 57. Reverón-Gómez N, González-Aguilera C, Stewart-Morgan KR, Petryk N, Flury

- 1050 V, Graziano S, et al. Accurate Recycling of Parental Histones Reproduces the Histone  
1051 Modification Landscape during DNA Replication. *Mol Cell*. 2018;72:239-249.e5.  
1052 58. Lopez-Delisle L, Rodríguez-Carballo E, Duboule D. gtf file used in Rodríguez-  
1053 Carballo et al. 2019. 2019. doi:10.6084/m9.figshare.7775837.  
1054 59. Dobin A, Davis CA, Schlesinger F, Drenkow J, Zaleski C, Jha S, et al. STAR:  
1055 ultrafast universal RNA-seq aligner. *Bioinformatics*. 2013;29:15–21.  
1056 60. Love MI, Huber W, Anders S. Moderated estimation of fold change and  
1057 dispersion for RNA-seq data with DESeq2. *Genome Biol*. 2014;15:550.  
1058 61. Montavon T, Le Garrec J-F, Kerszberg M, Duboule D. Modeling Hox gene  
1059 regulation in digits: reverse collinearity and the molecular origin of thumbness. *Genes*  
1060 *Dev*. 2008;22:346–59.  
1061 62. David FP, Delafontaine J, Carat S, Ross FJ, Lefebvre G, Jarosz Y, et al.  
1062 HTSstation: a web application and open-access libraries for high-throughput  
1063 sequencing data analysis. *PLoS One*. 2014;9:e85879.  
1064 63. Schmidl C, Rendeiro AF, Sheffield NC, Bock C. ChIPmentation: fast, robust,  
1065 low-input ChIP-seq for histones and transcription factors. *Nat Methods*. 2015;12:963–  
1066 5.  
1067 64. Martin M. Cutadapt removes adapter sequences from high-throughput sequencing  
1068 reads. 2011. 2011;17. doi:10.14806/ej.17.1.200.  
1069 65. Langmead B, Salzberg SL. Fast gapped-read alignment with Bowtie 2. *Nat*  
1070 *Methods*. 2012;9:357–9.  
1071 66. Zhang Y, Liu T, Meyer CA, Eeckhoutte J, Johnson DS, Bernstein BE, et al.  
1072 Model-based analysis of ChIP-Seq (MACS). *Genome Biol*. 2008;9:R137.  
1073 67. Quinlan AR. BEDTools: The Swiss-Army Tool for Genome Feature Analysis.  
1074 *Curr Protoc Bioinforma*. 2014;47:11 12 1-11 12 34.  
1075 68. Ramirez F, Dundar F, Diehl S, Gruning BA, Manke T. deepTools: a flexible  
1076 platform for exploring deep-sequencing data. *Nucleic Acids Res*. 2014;42 Web Server  
1077 issue:W187-91.  
1078 69. Woltering JM, Vonk FJ, Muller H, Bardine N, Tudeau IL, de Bakker MA, et al.  
1079 Axial patterning in snakes and caecilians: evidence for an alternative interpretation of  
1080 the Hox code. *Dev Biol*. 2009;332:82–9.  
1081 70. Tarchini B, Duboule D. Control of Hoxd genes' collinearity during early limb  
1082 development. *Dev Cell*. 2006;10:93–103.  
1083



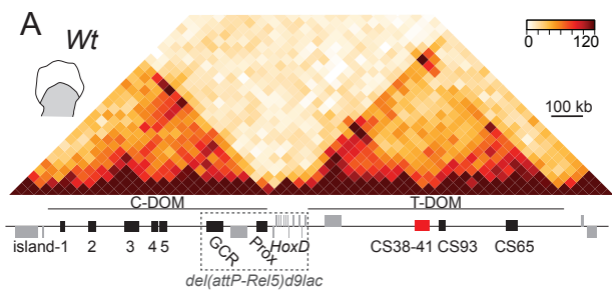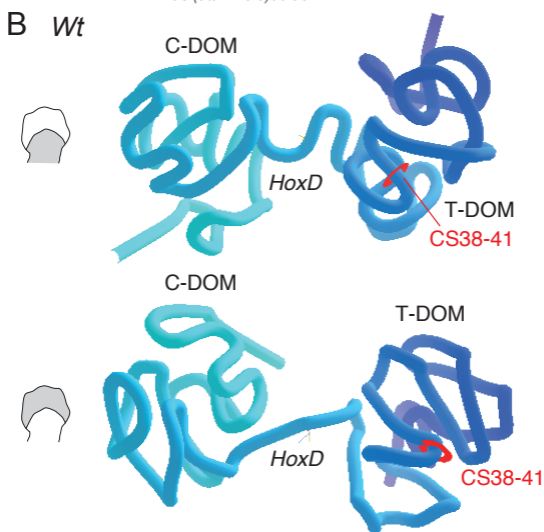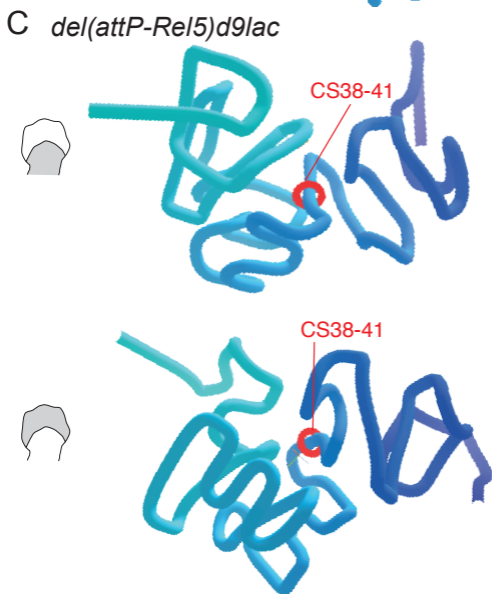

# Rodríguez-Carballo et al Fig. 2

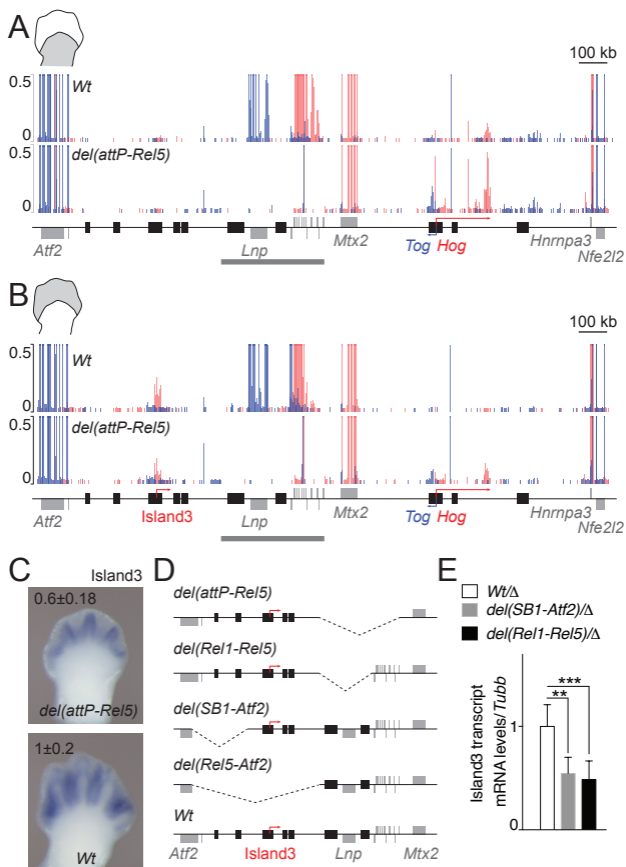

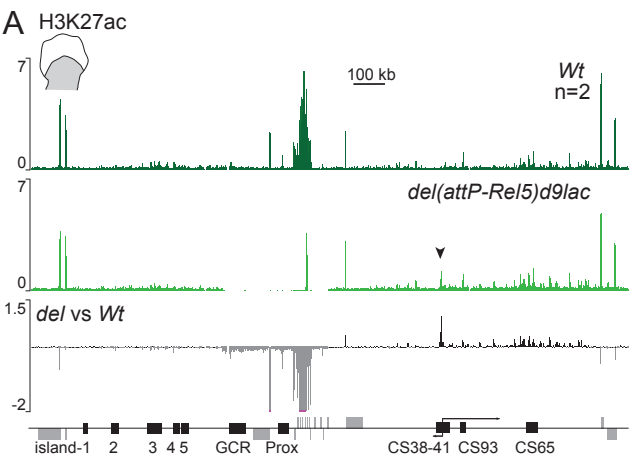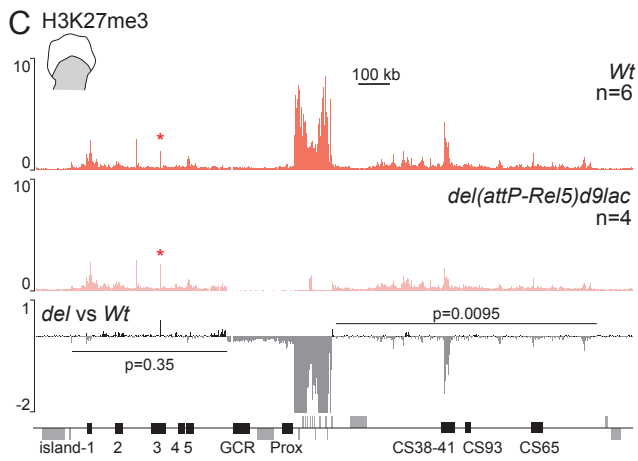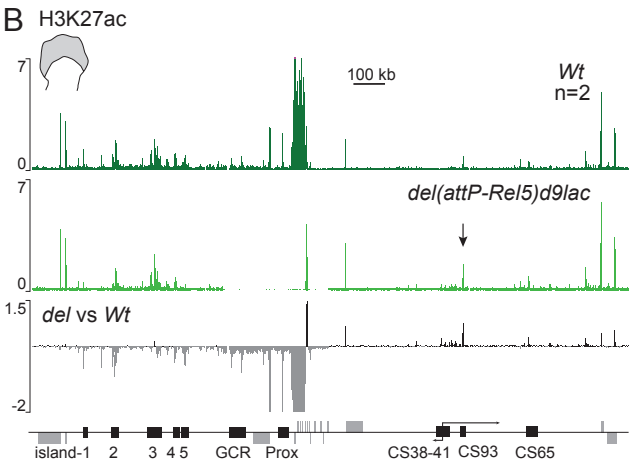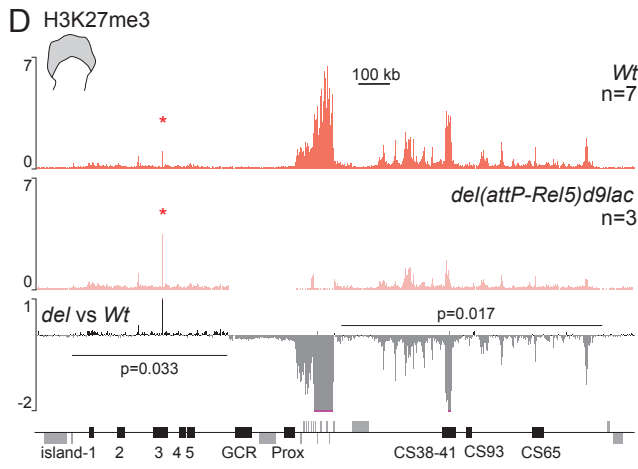

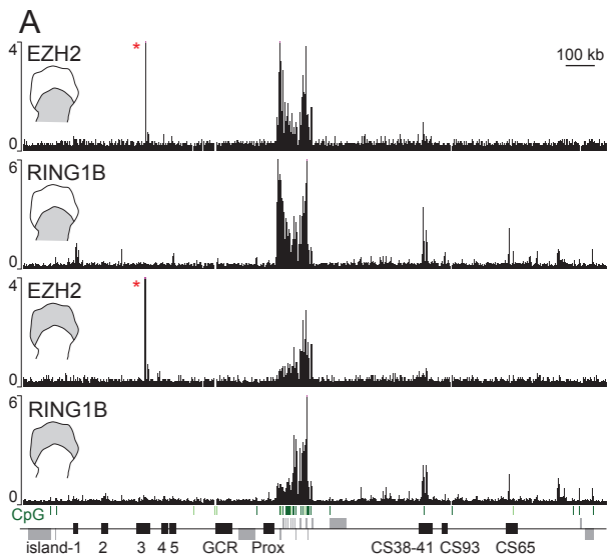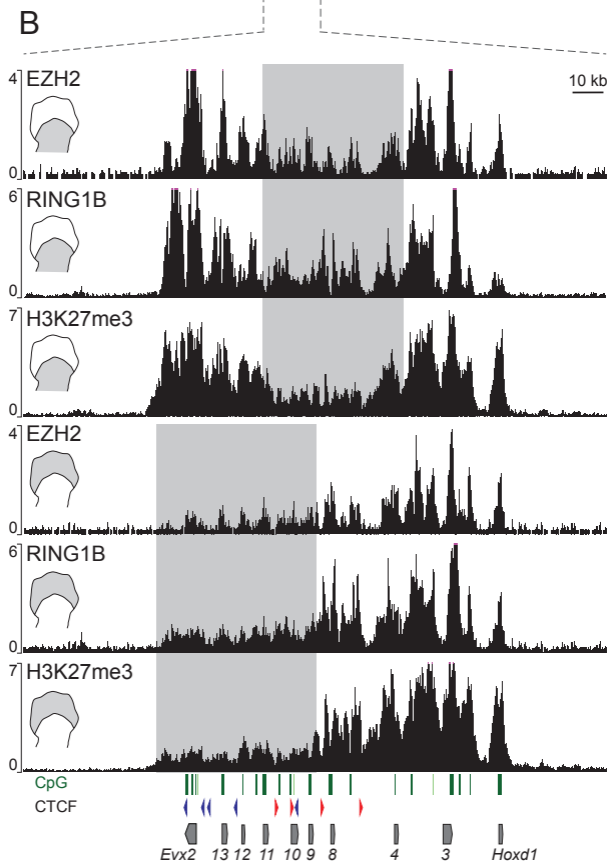

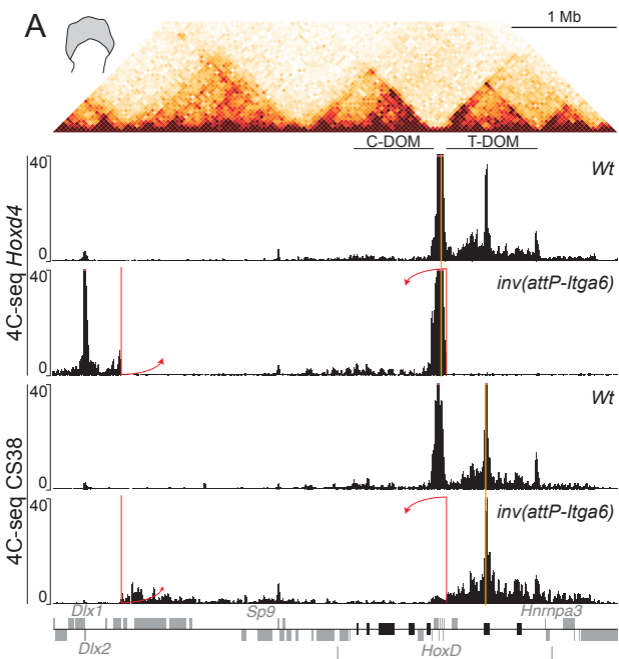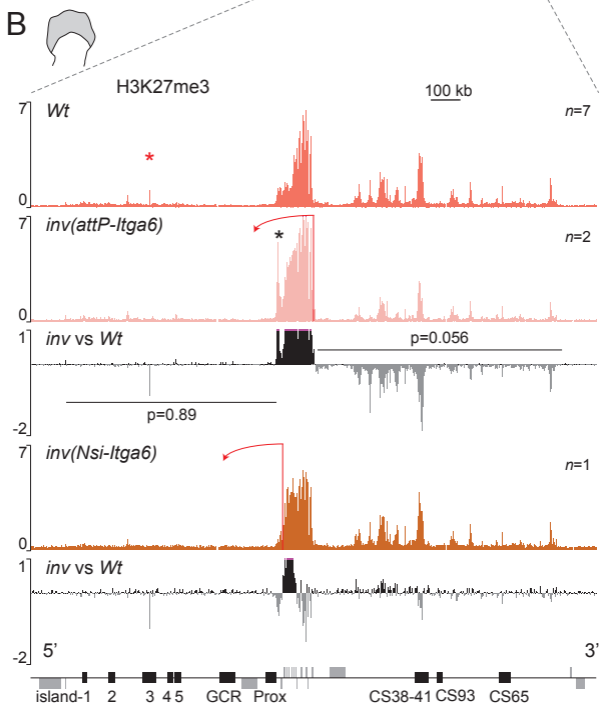

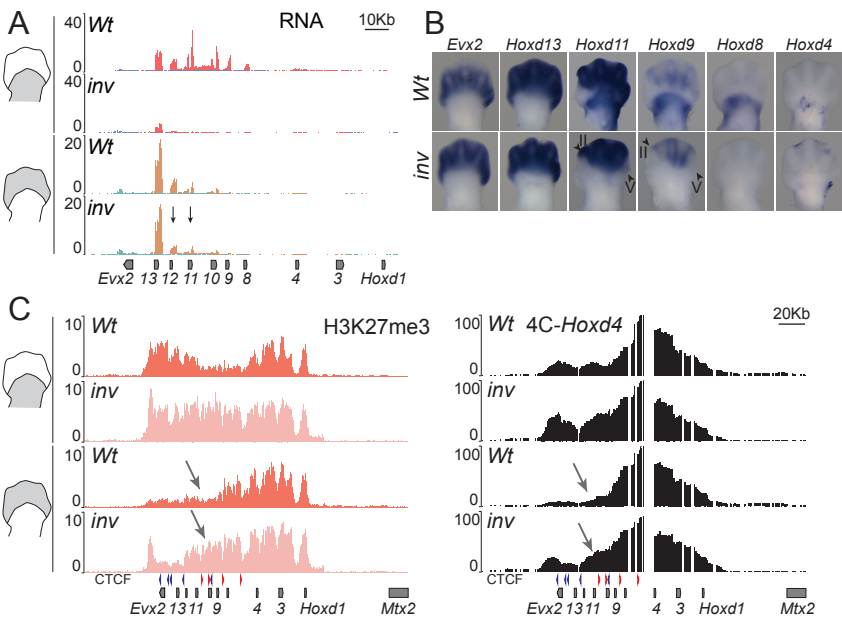

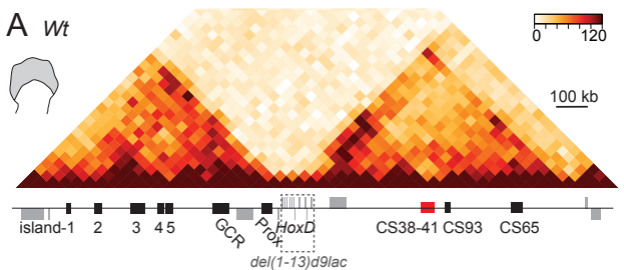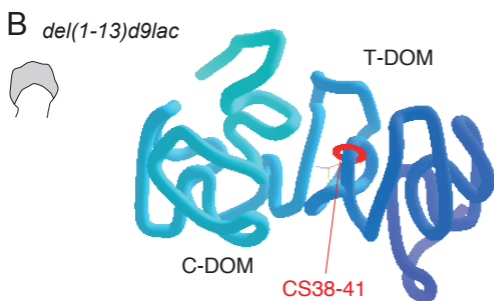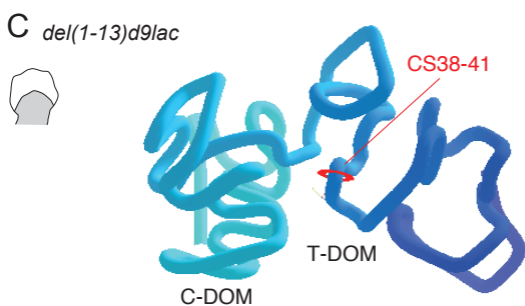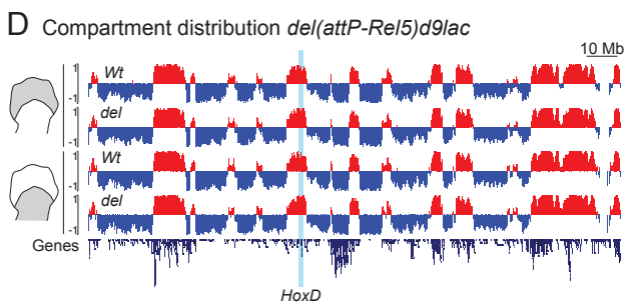

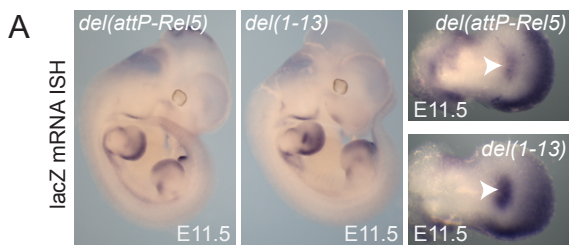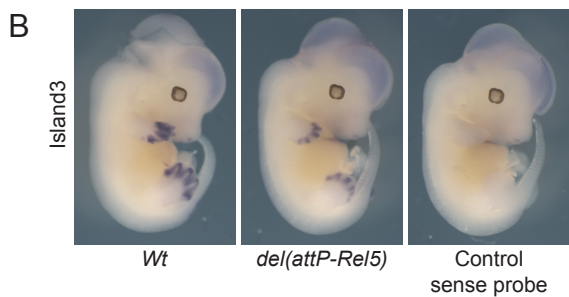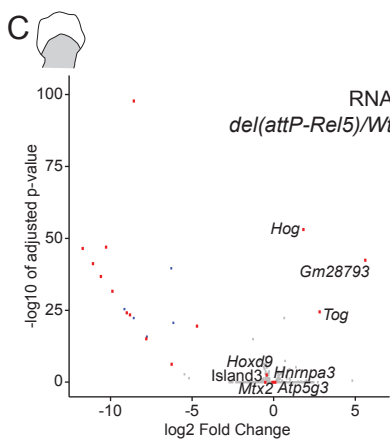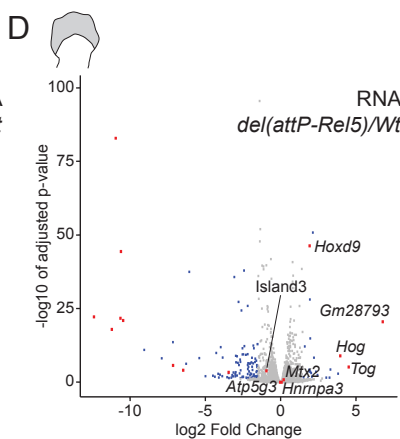



A

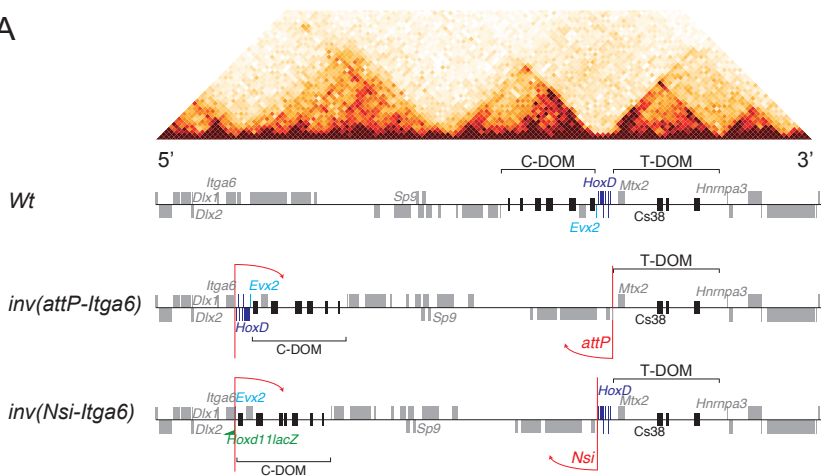

B

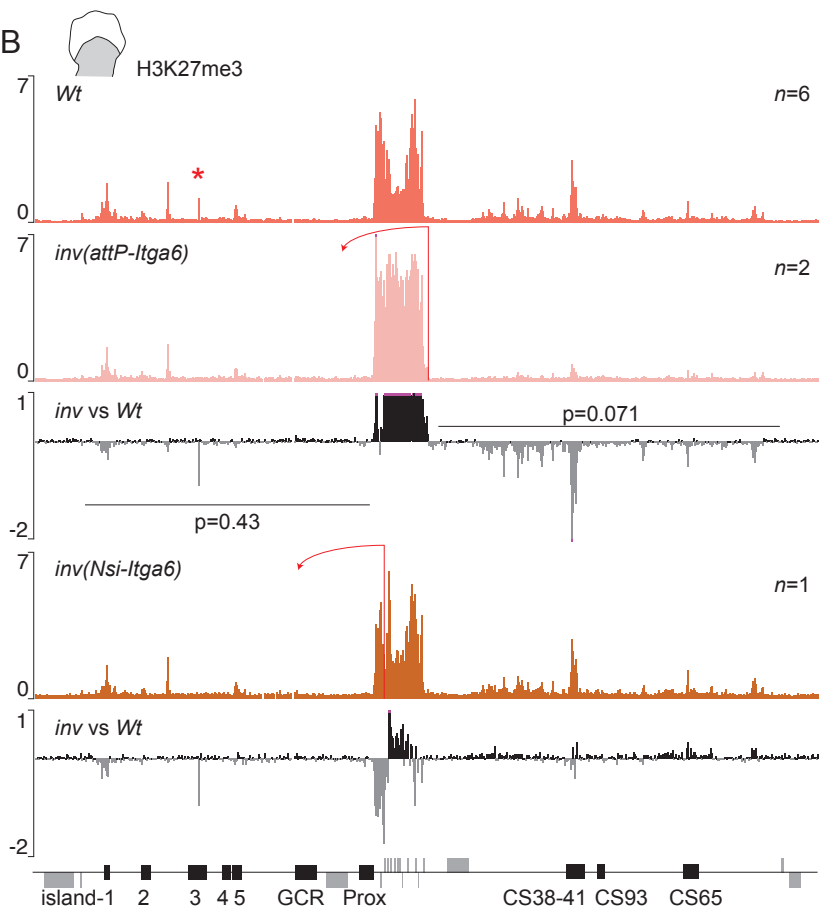

A

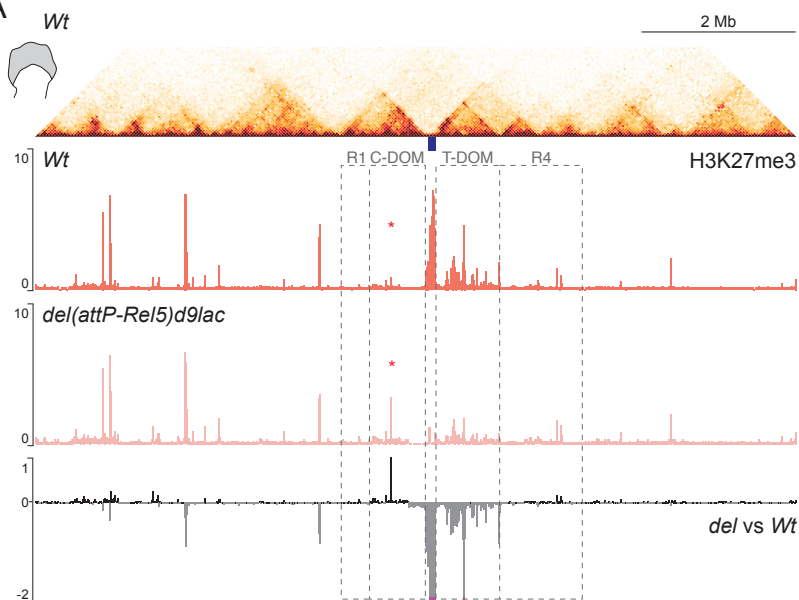

B

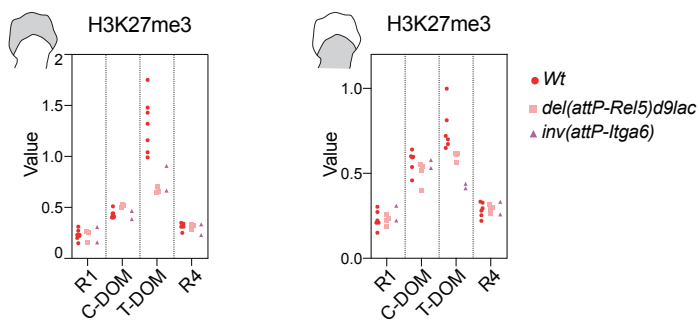

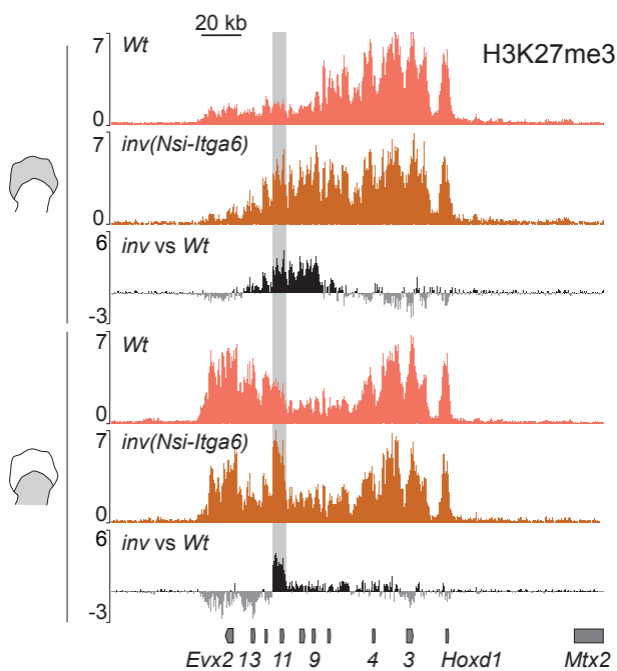

Source: https://www.biorxiv.org/content/10.1101/587303v1.full.pdf
